# Supplementary material for: Synthesis and solid-state fluorescence properties of pentacyclic 7-substituted-indeno[1′,2′:4,5]pyrido[2,1-a]isoindol-5-ones
Source: Royal Society of Chemistry journal article supplement (doi:10.1039/c4ra12155d), 2014-12-01
Supplement: c4ra12155d1.pdf [file c4ra12155d1.pdf]

## SUPPORTING INFORMATION

### Synthesis and Solid-state Fluorescence Properties of Pentacyclic 7-Substituted- indeno[1',2':4,5]pyrido[2,1-*a*]isoindol-5-ones

*Z. Chamas,<sup>a</sup> E. Marchi,<sup>b</sup> B. Presson,<sup>a</sup> E. Aubert,<sup>c</sup> Y. Fort,<sup>a</sup> P. Ceroni,<sup>b,\*</sup> and V. Mamane,<sup>a,d,\*</sup>*

<sup>a</sup> Laboratoire SRSMC, UMR CNRS 7565, Université de Lorraine, 54506 Vandoeuvre-les-Nancy, France.

<sup>b</sup> Department of Chemistry "G. Ciamician", University of Bologna. Via Selmi 2, 40126 Bologna, Italy. E-mail: paola.ceroni@unibo.it

<sup>c</sup> Laboratoire CRM2, UMR CNRS 7036, Université de Lorraine, 54506 Vandoeuvre-les-Nancy, France.

<sup>d</sup> New adress: Institut de Chimie de Strasbourg, UMR 7177, Equipe LASYROC, 1 rue Blaise Pascal, 67008 Strasbourg, France. E-mail: vmamane@unistra.fr

#### Content

- Copy of <sup>1</sup>H and <sup>13</sup>C NMR spectra of all new compounds
- ORTEP view of compounds **2**, **15a** and **15d**

**3,10-Dimethoxy-7,8-dihydro-8-hydroxy-7-methyl-indeno[1',2':4,5]pyrido[2,1-a]isoindol-5-one (7b)**

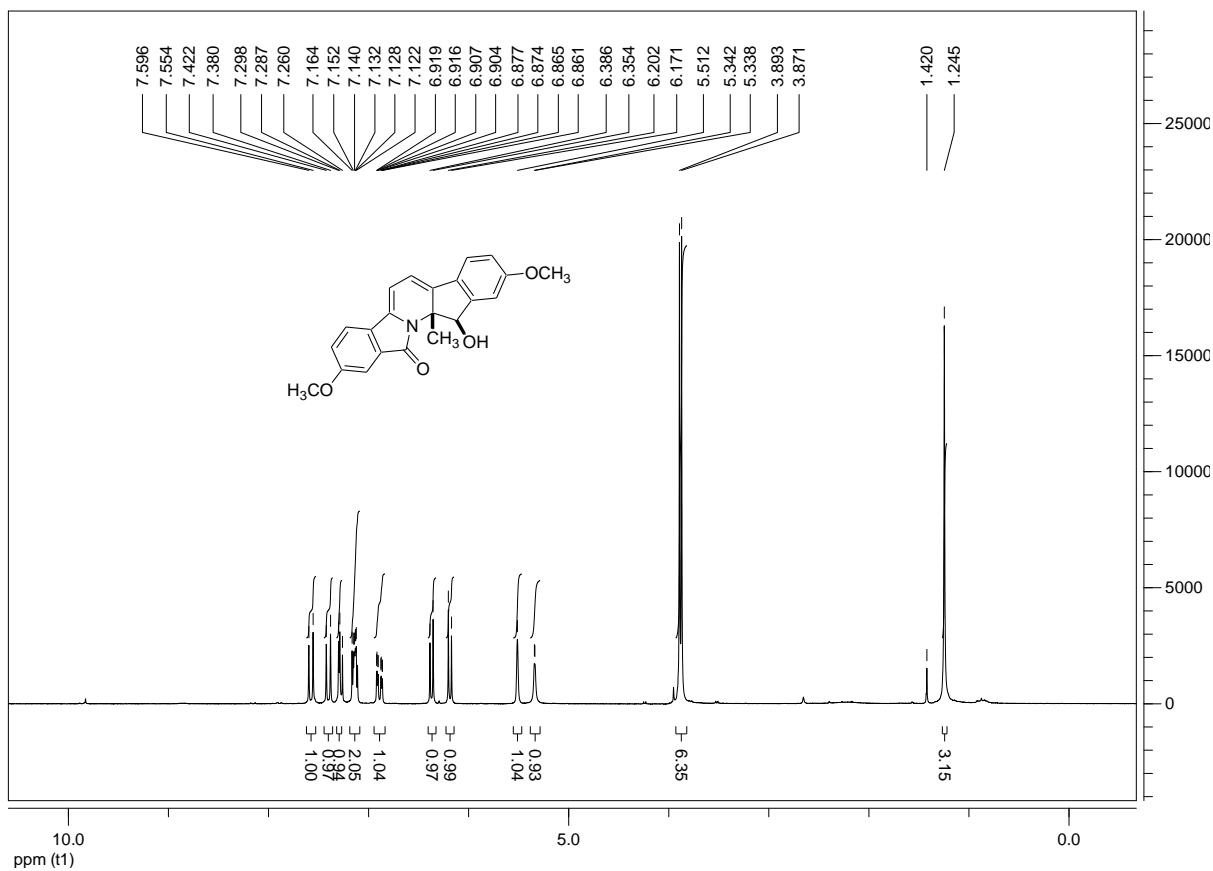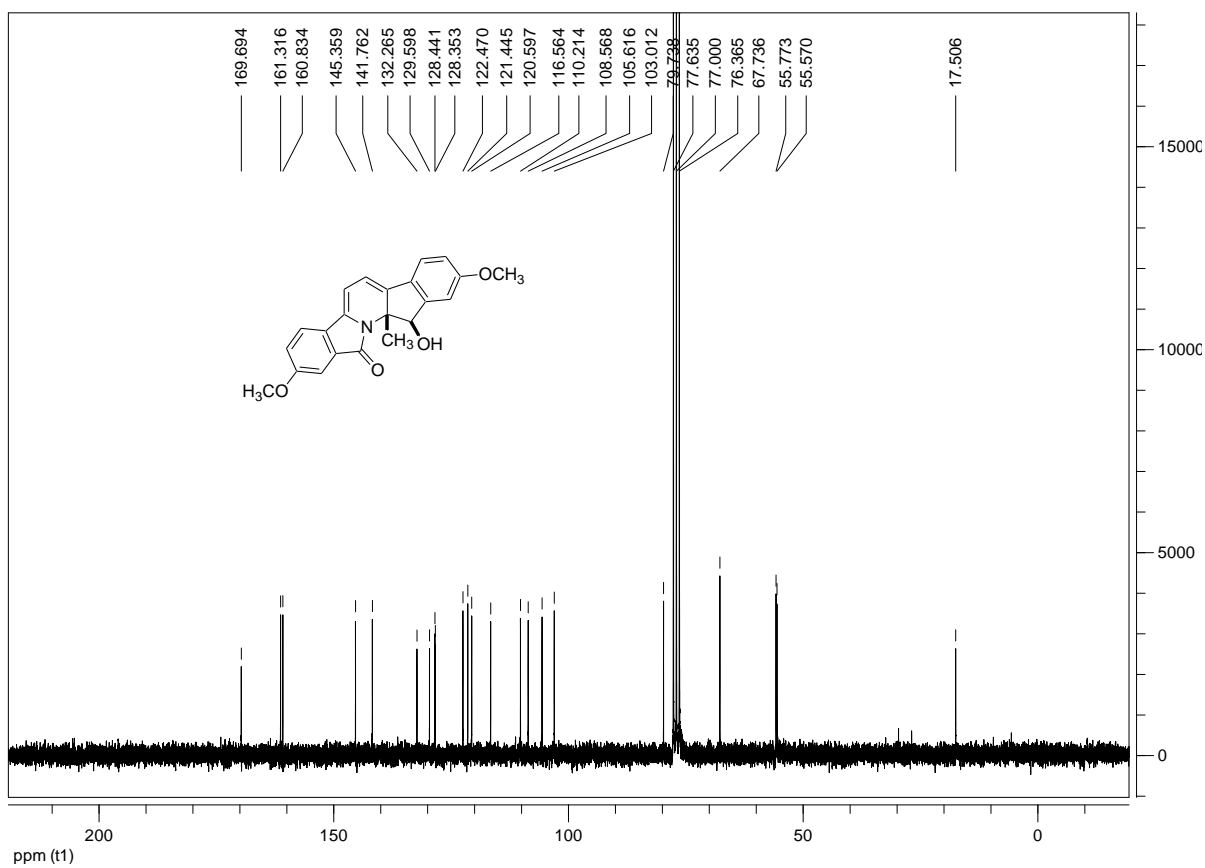

## 2-(6-Chloro-2-methyl-pyridin-3-yl)-benzaldehyde (8)

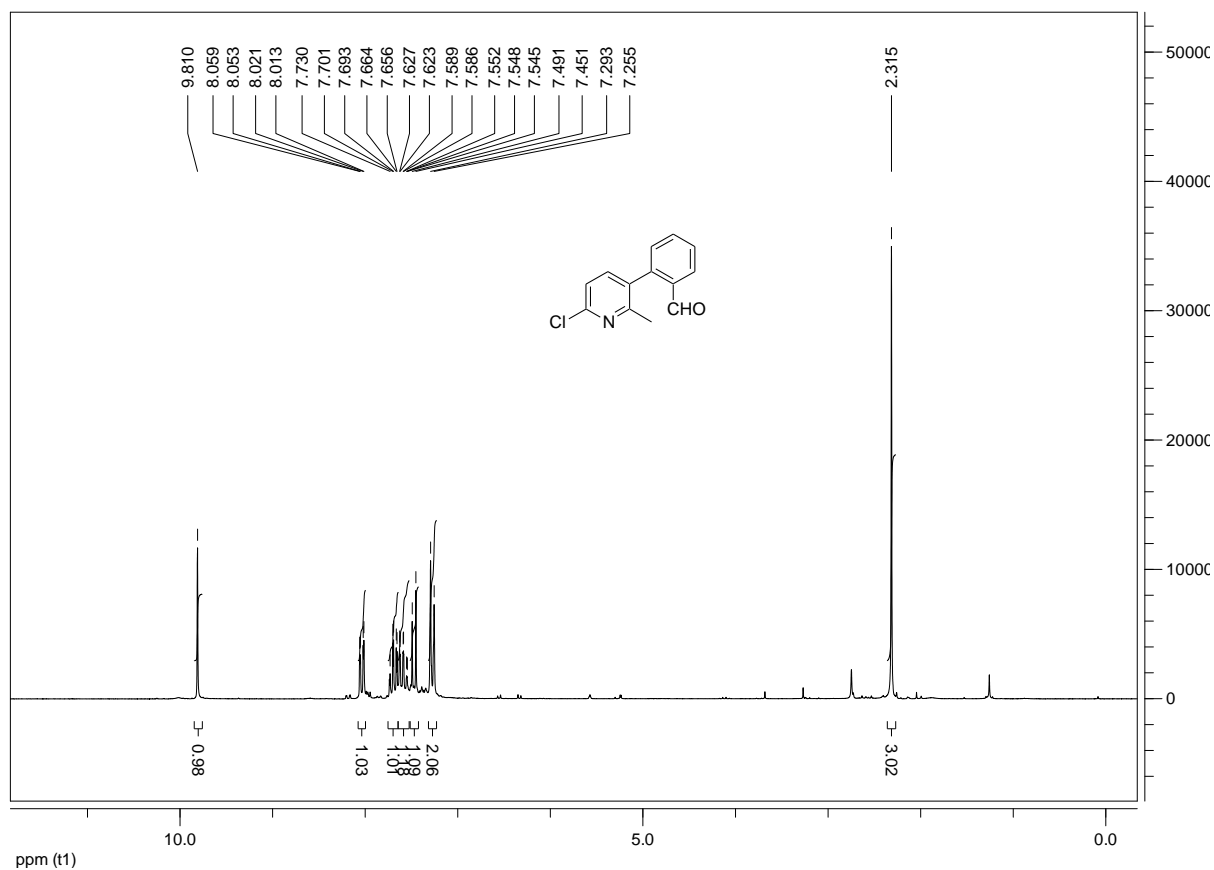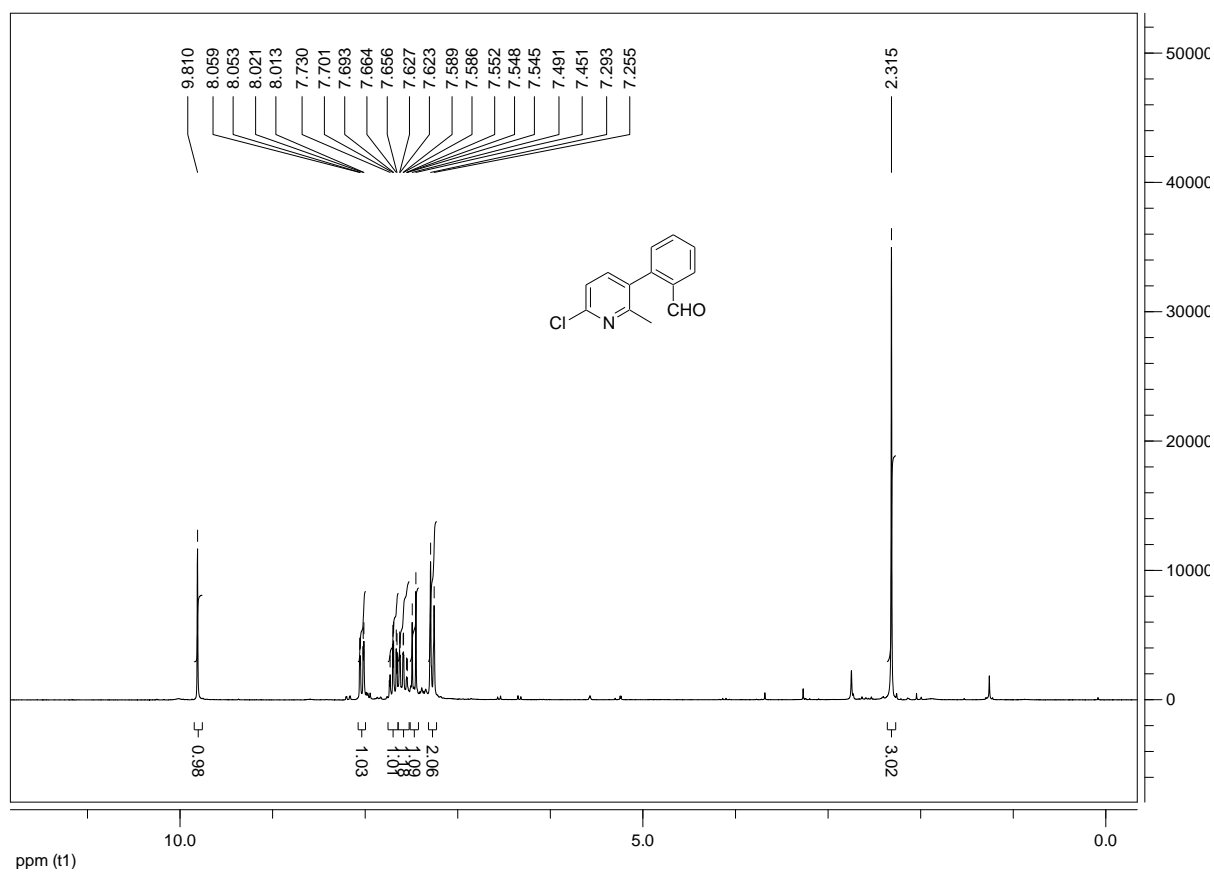

**3-Methoxy-7,8-dihydro-8-hydroxy-7-methyl-indeno[1',2':4,5]pyrido[2,1-a]isoindol-5-one (9b)**

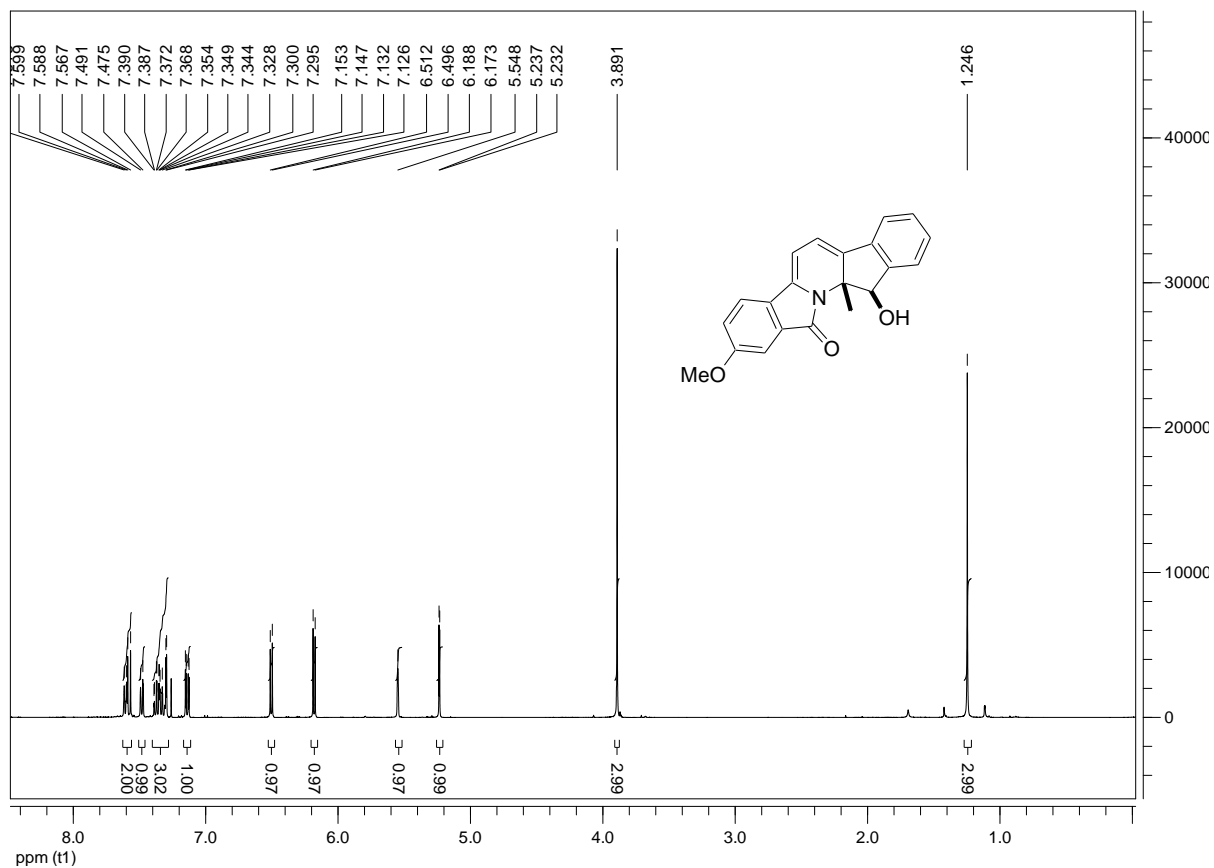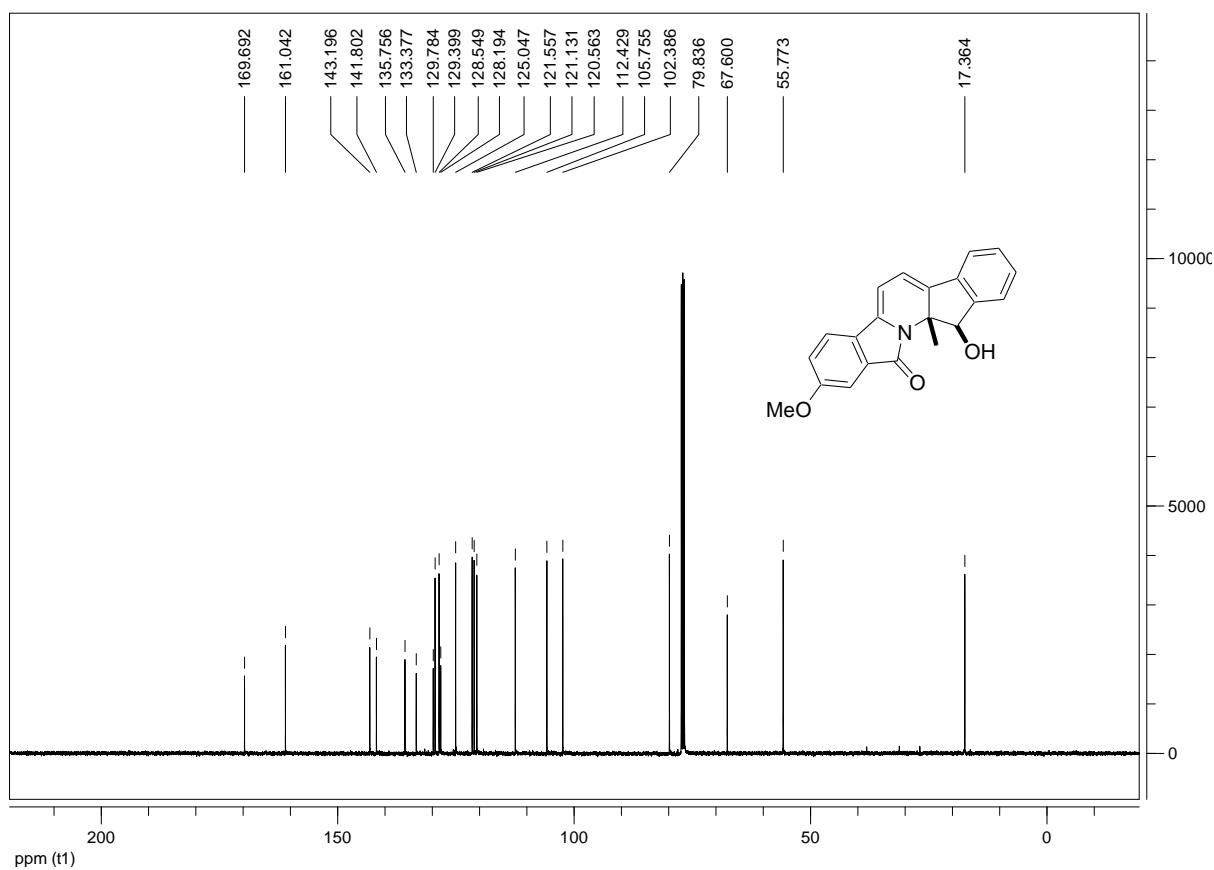

## 2-Amino-5,6-bromopyridine (13)

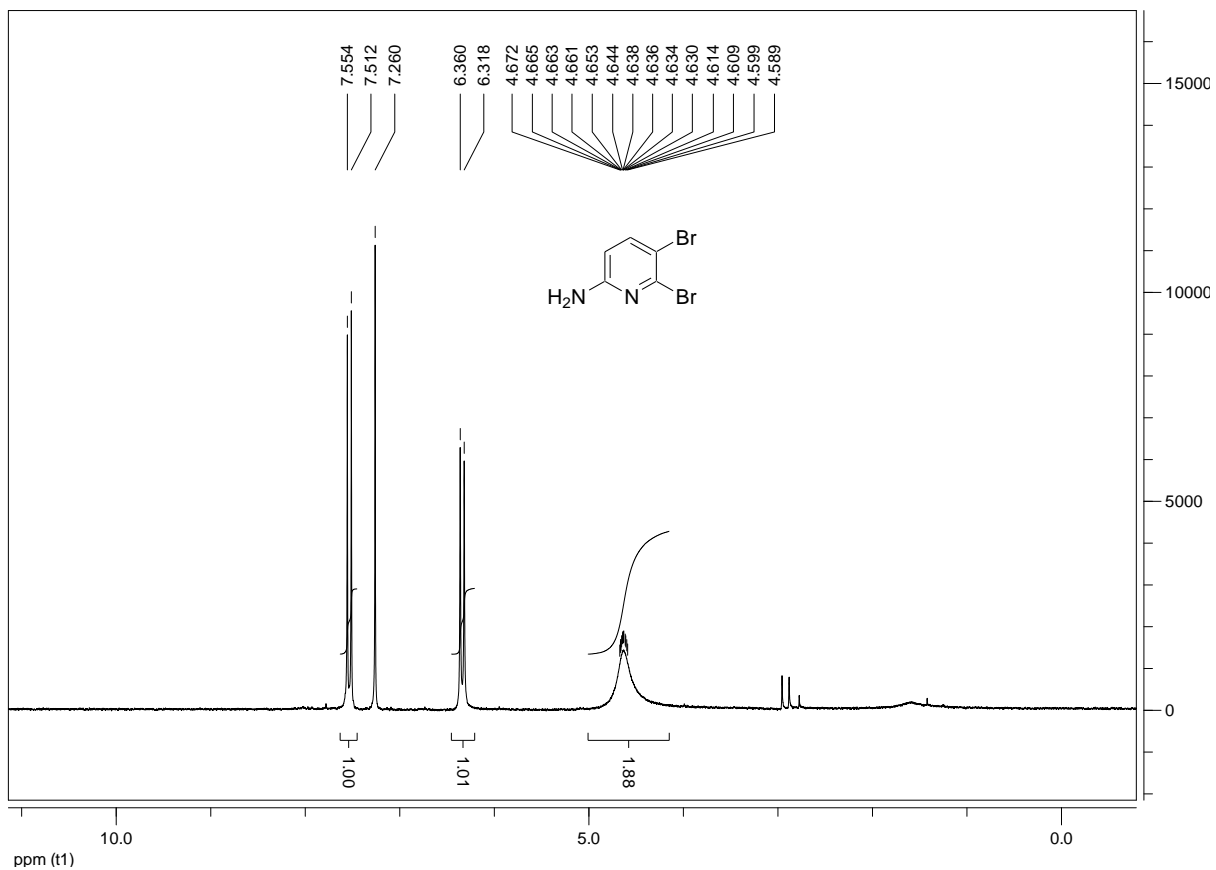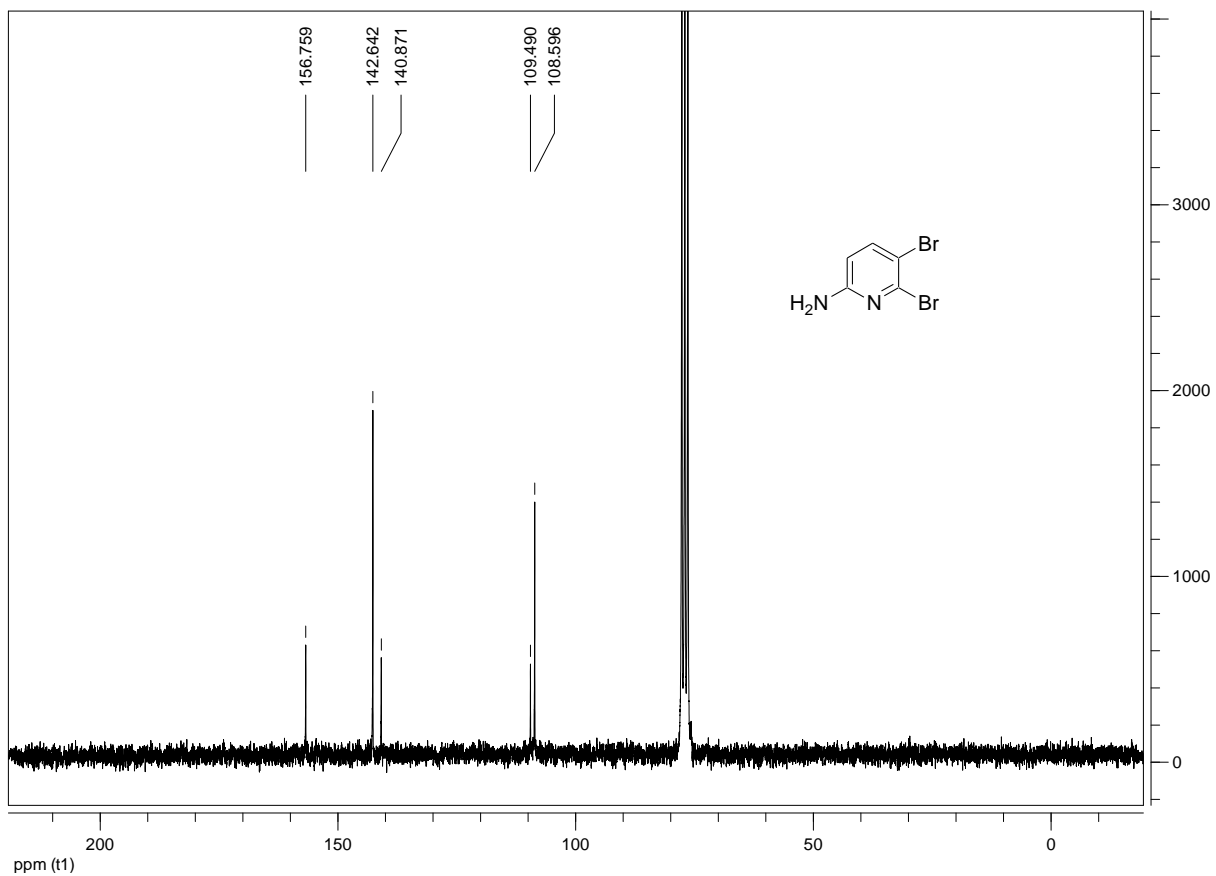

# 2,3-Dibromo-6-chloropyridine (11)

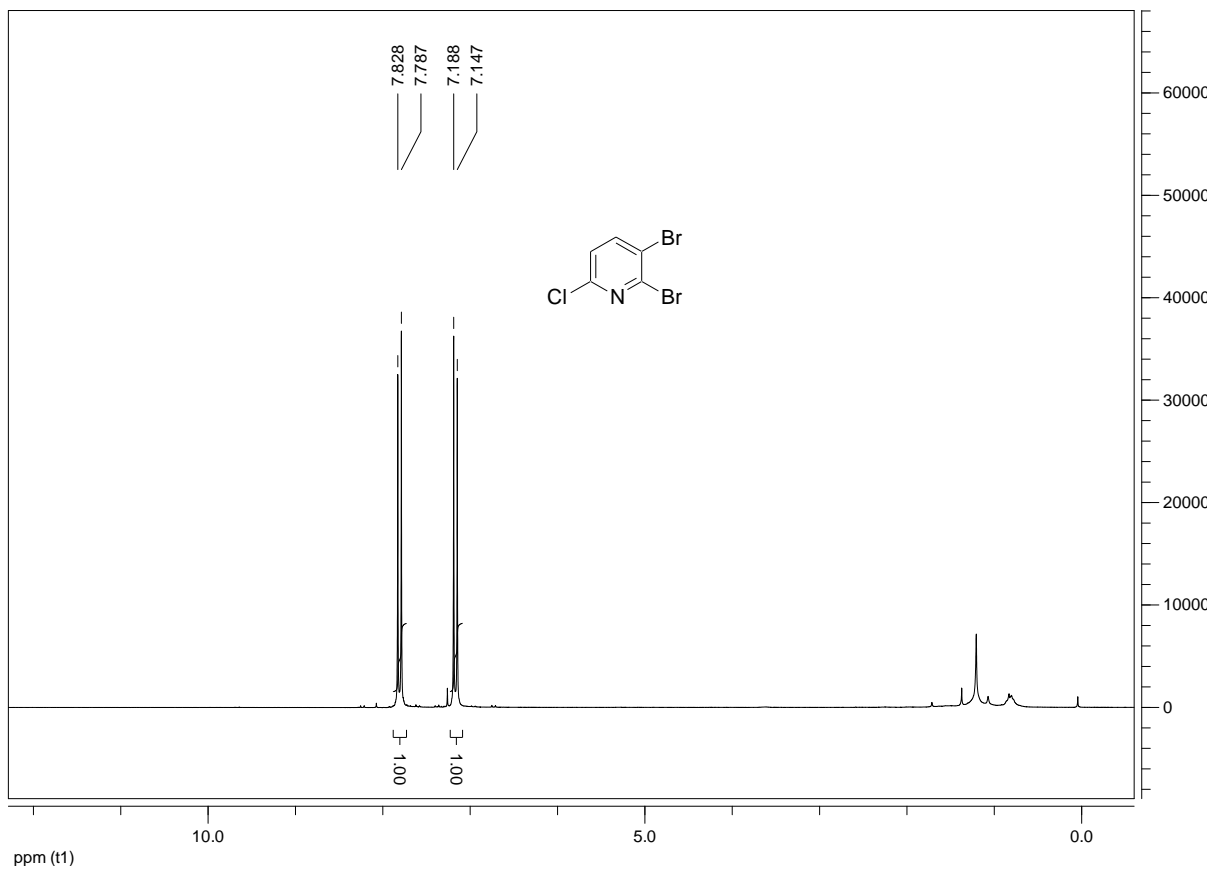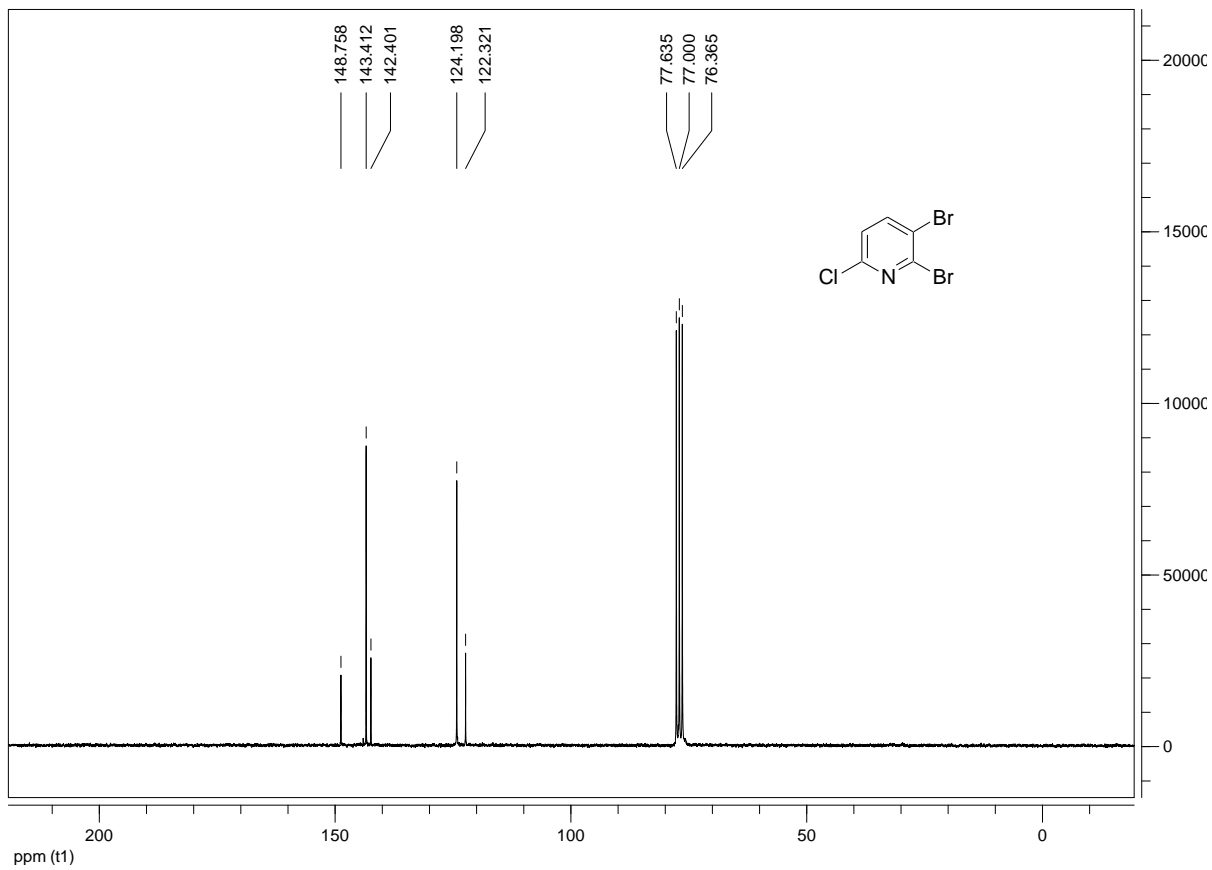

### 3-Bromo-6-chloro-2-phenylpyridine (10a)

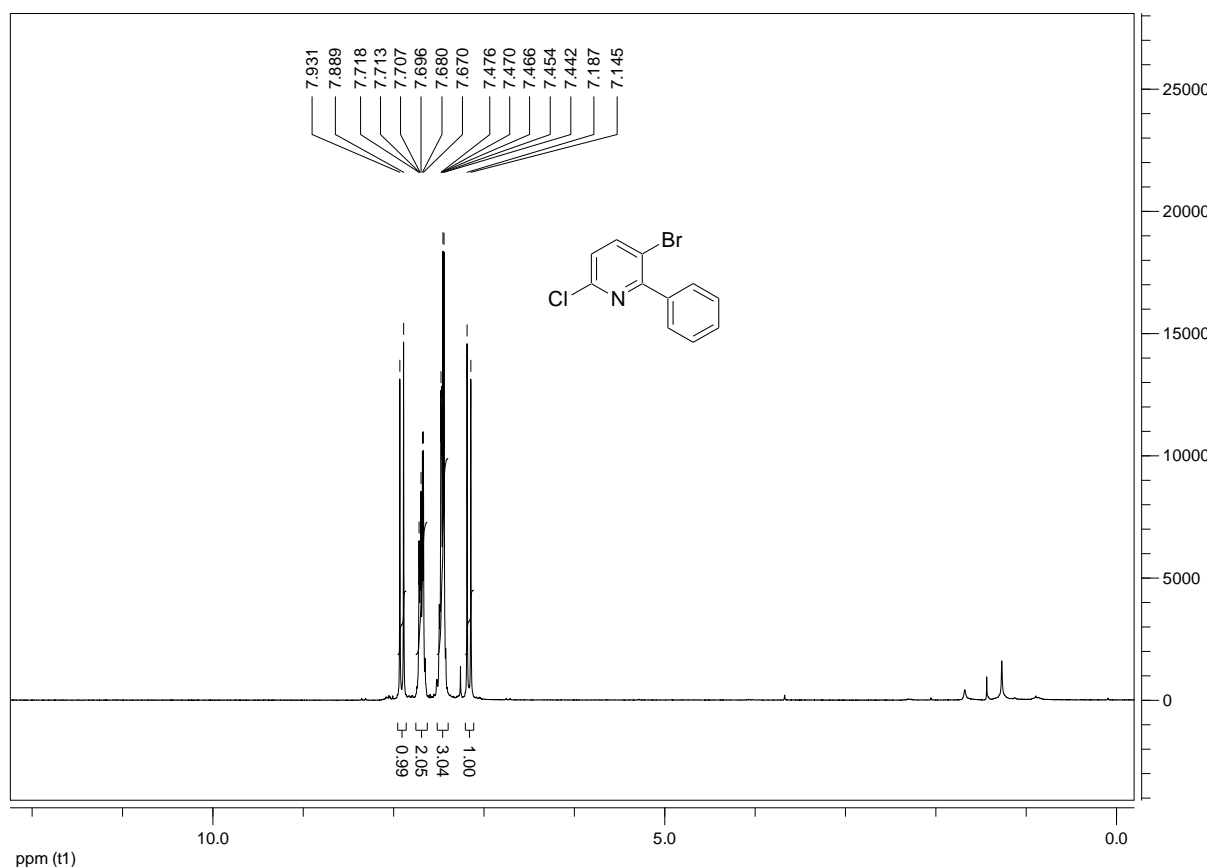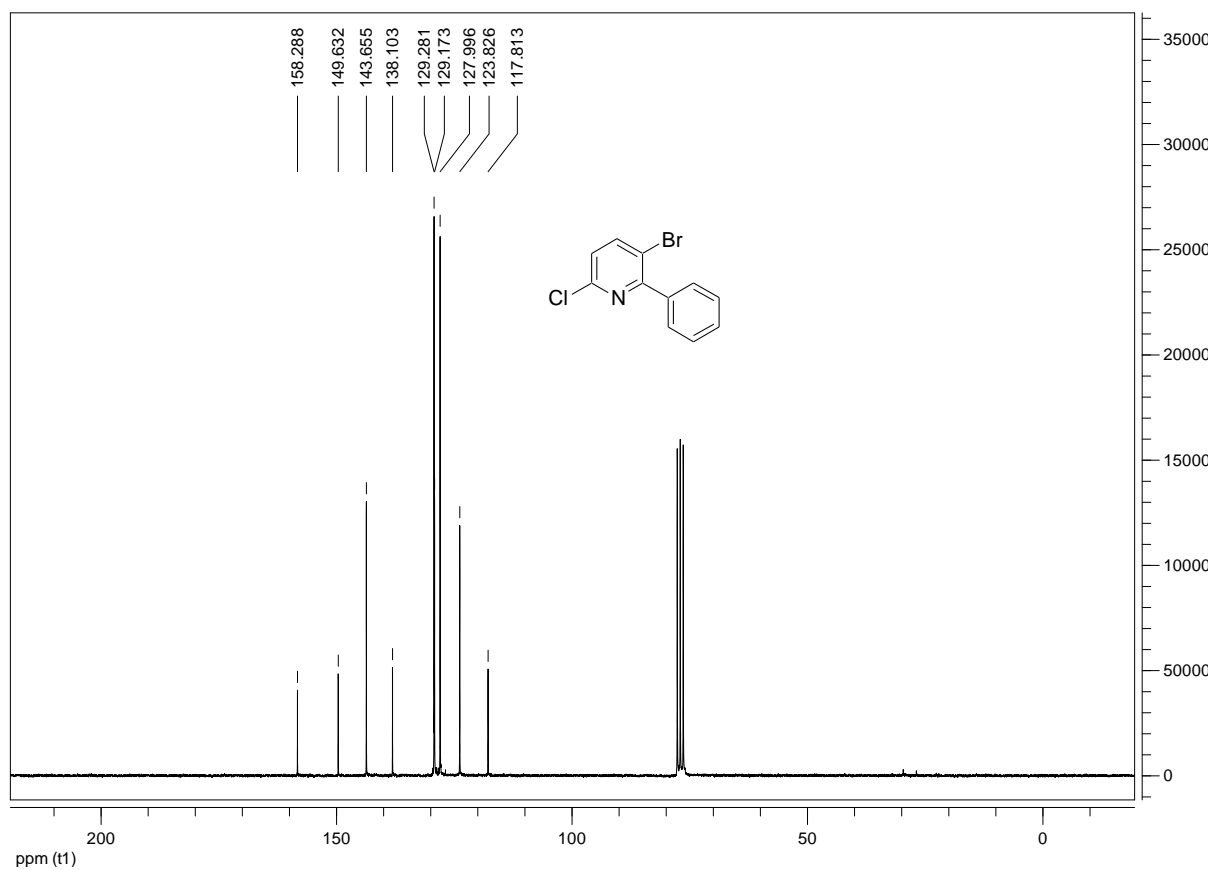

### 3-Bromo-6-chloro-2-(4-methoxyphenyl)pyridine (10b)

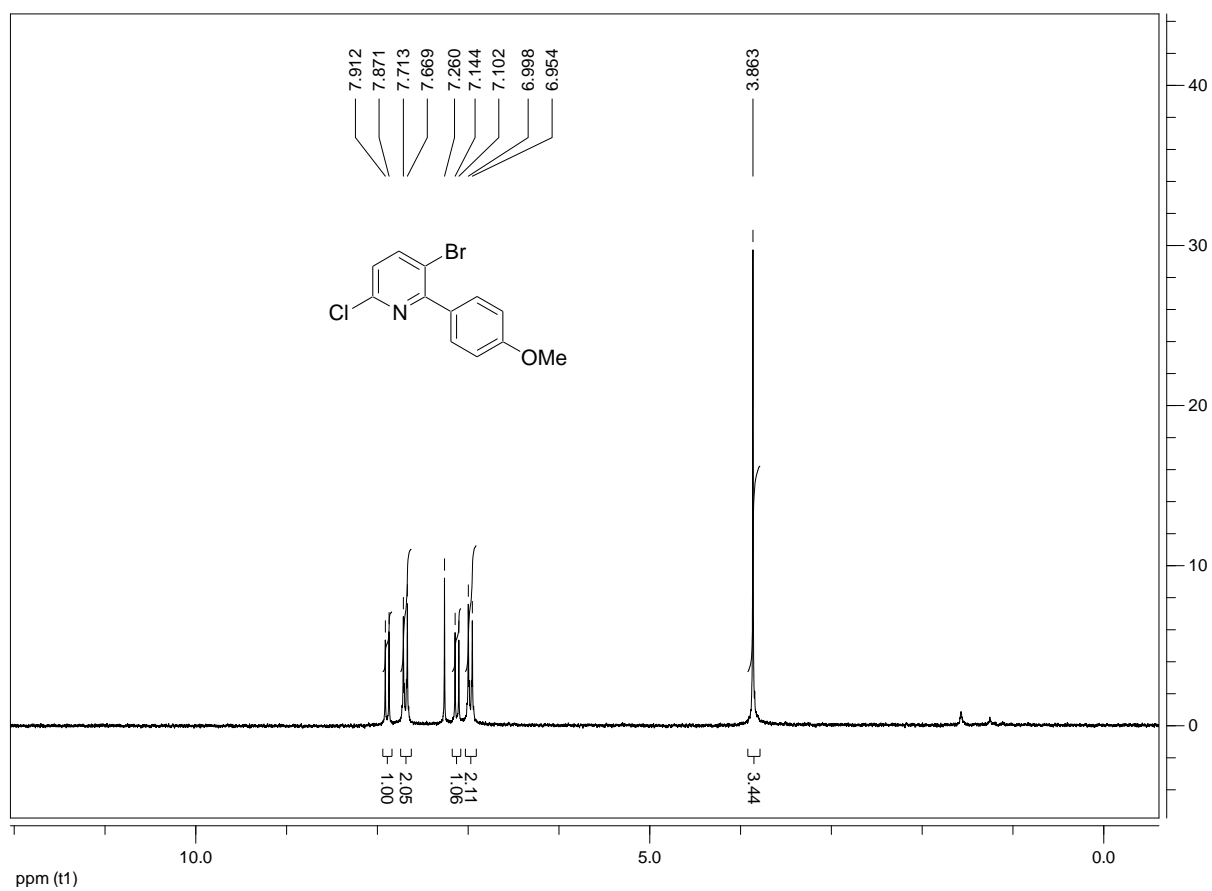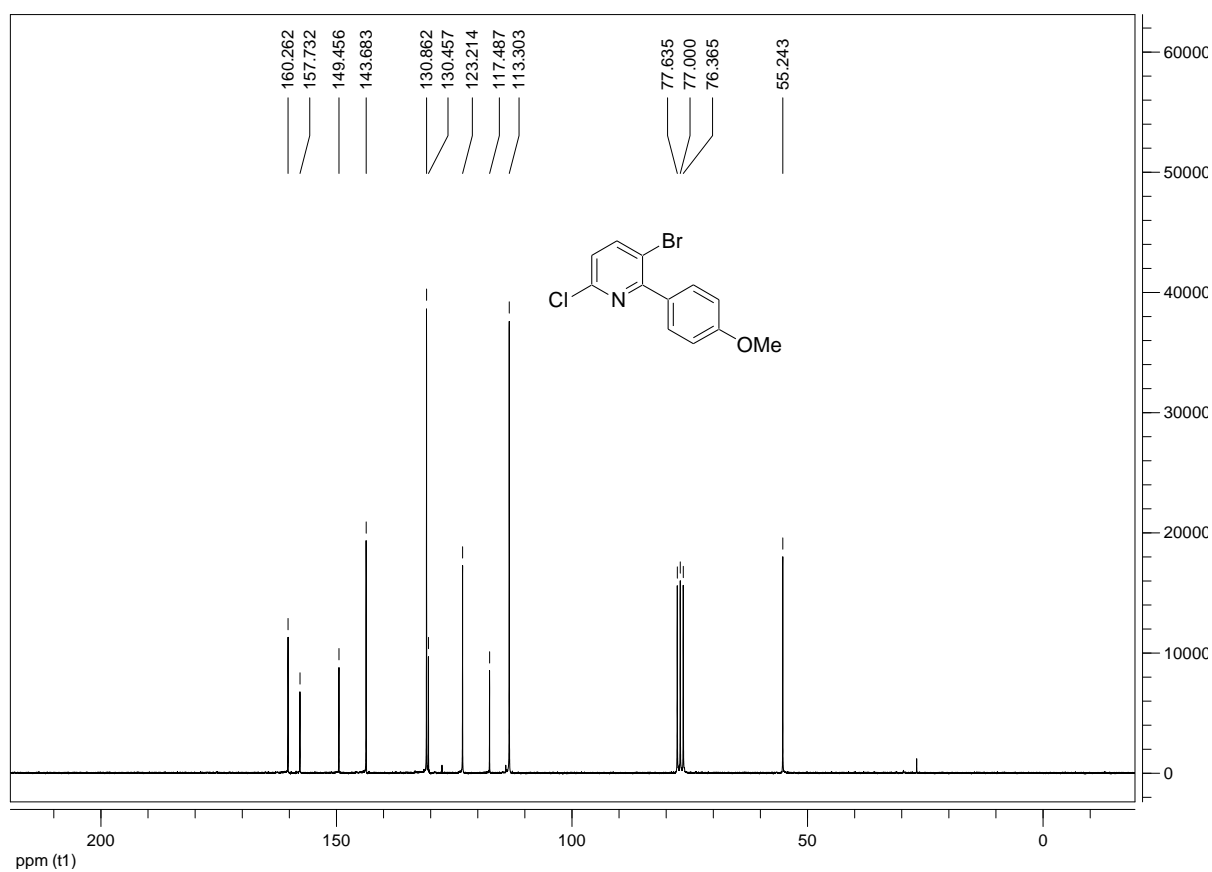



### 3-Bromo-6-chloro-2-(4-(methylthio)phenyl)pyridine (10c)

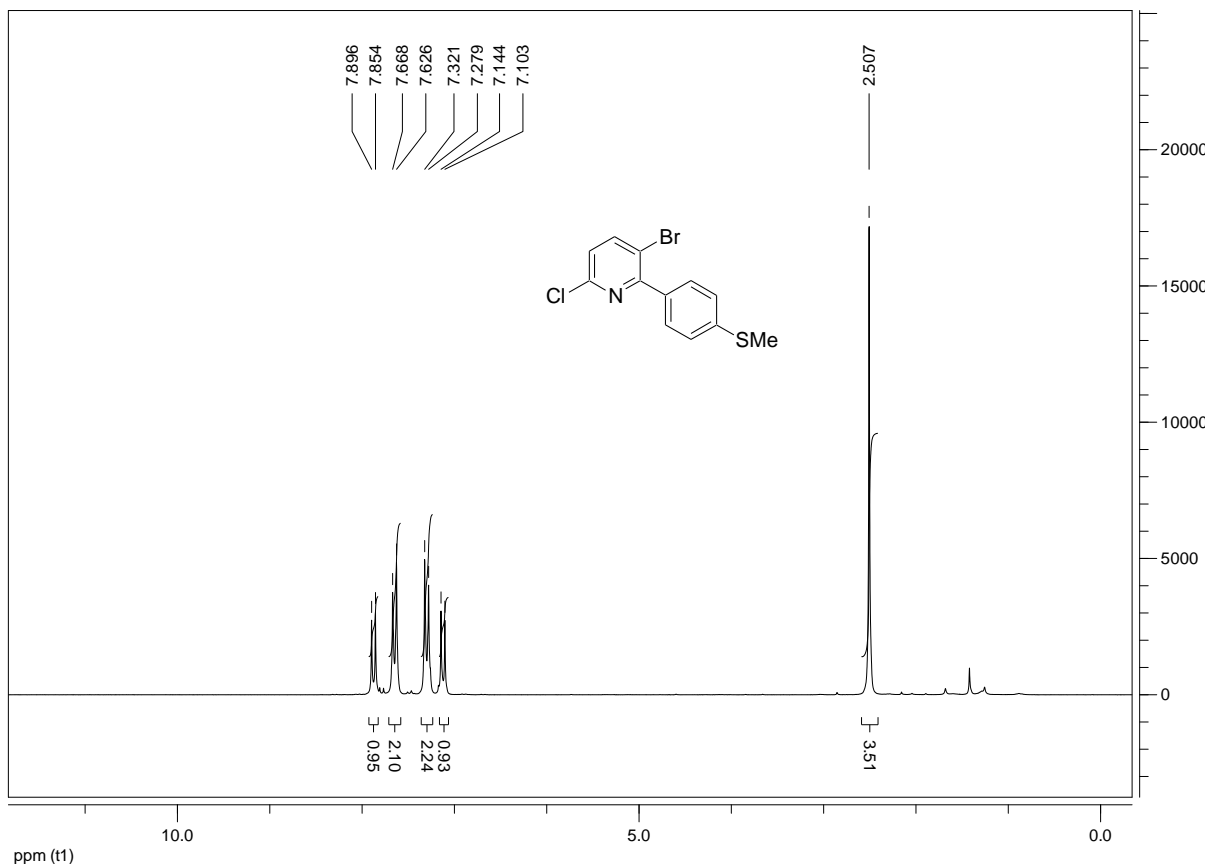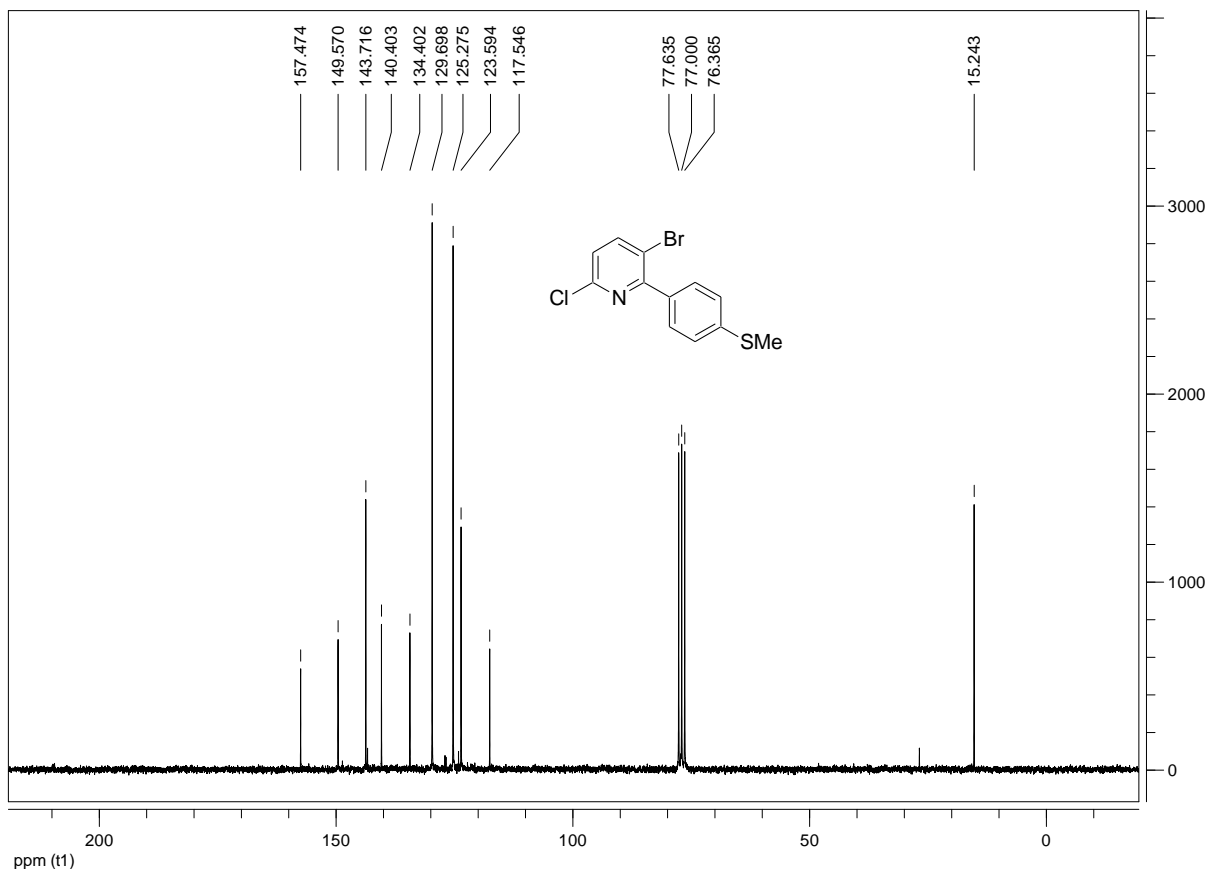

### 4-(3-Bromo-6-chloropyridin-2-yl)benzaldehyde (10d)

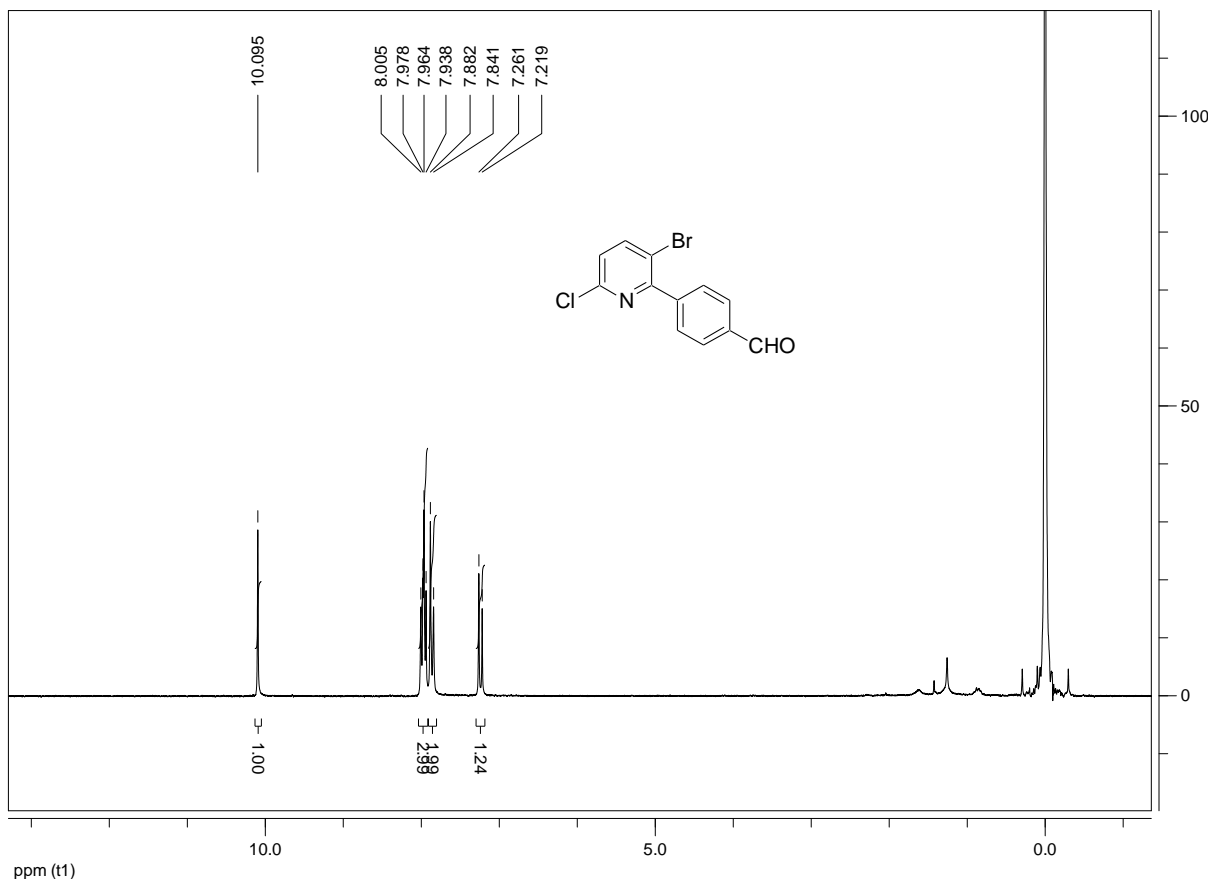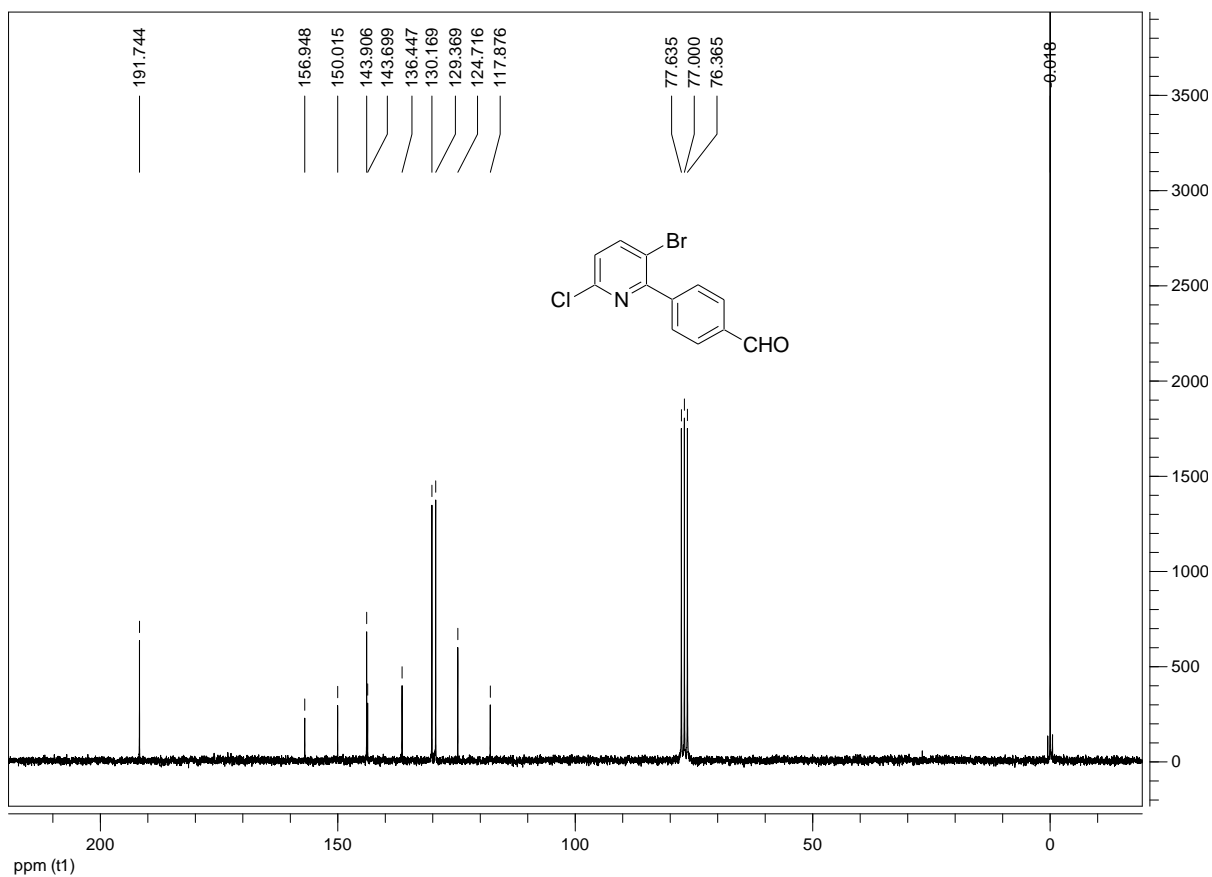

### 3-Bromo-6-chloro-2-[4-(dimethylamino)phenyl]pyridine (10e)

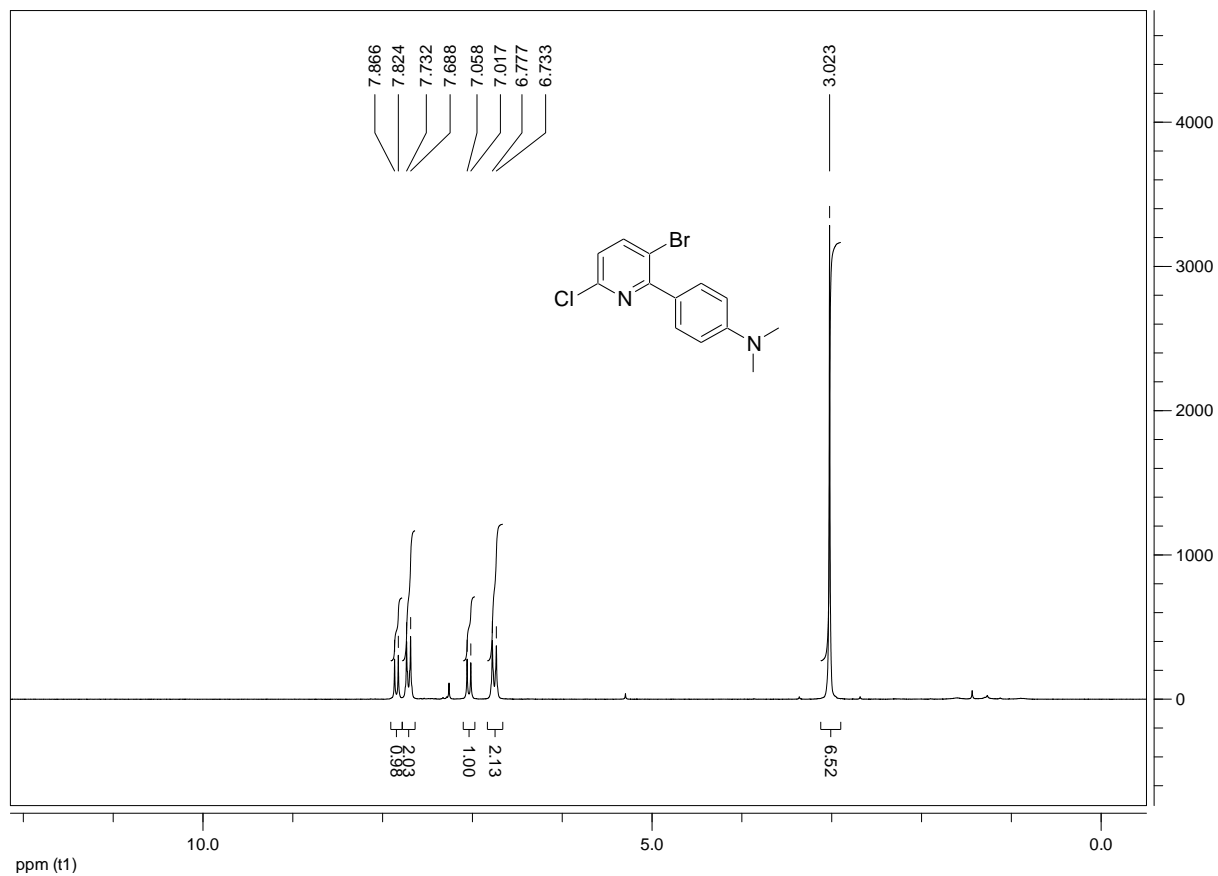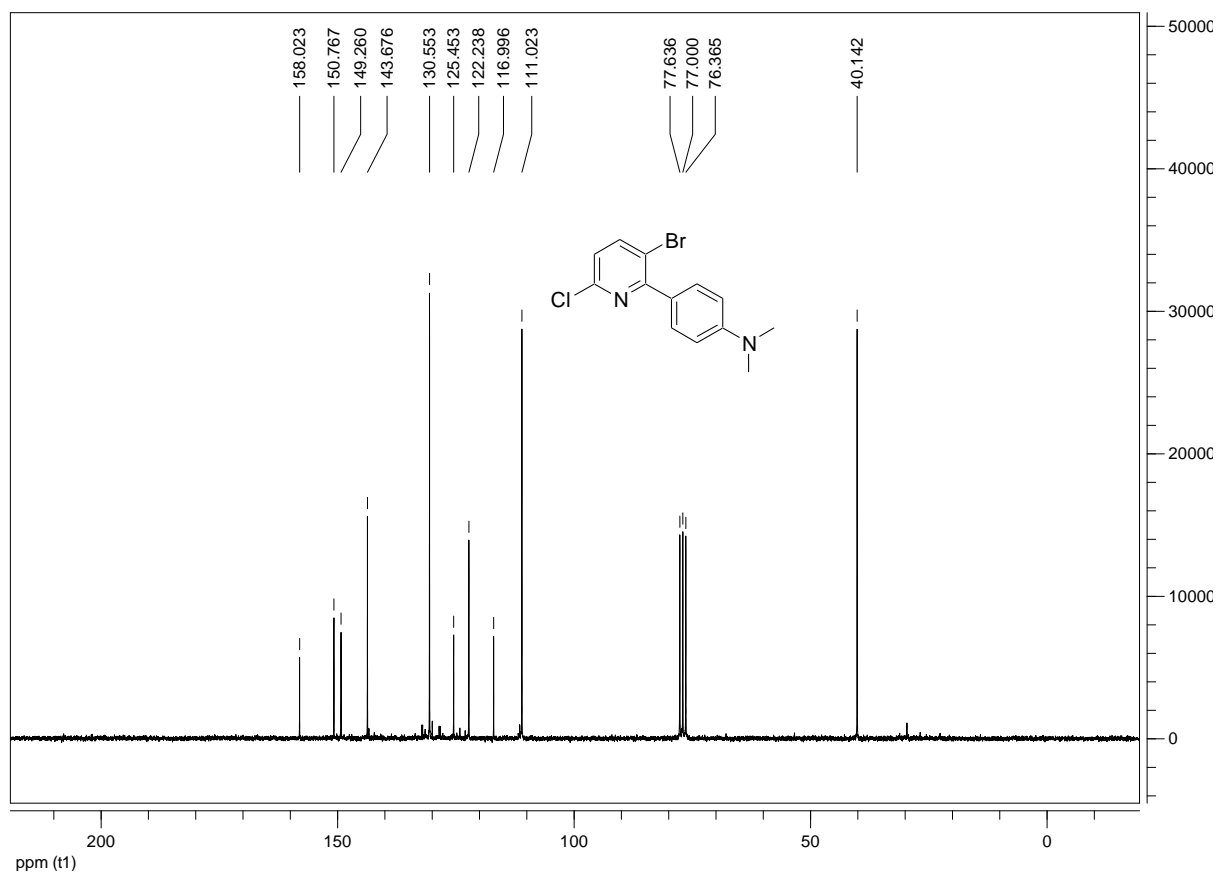

### 4-(3-Bromo-6-chloropyridin-2-yl)pyridine (10f)

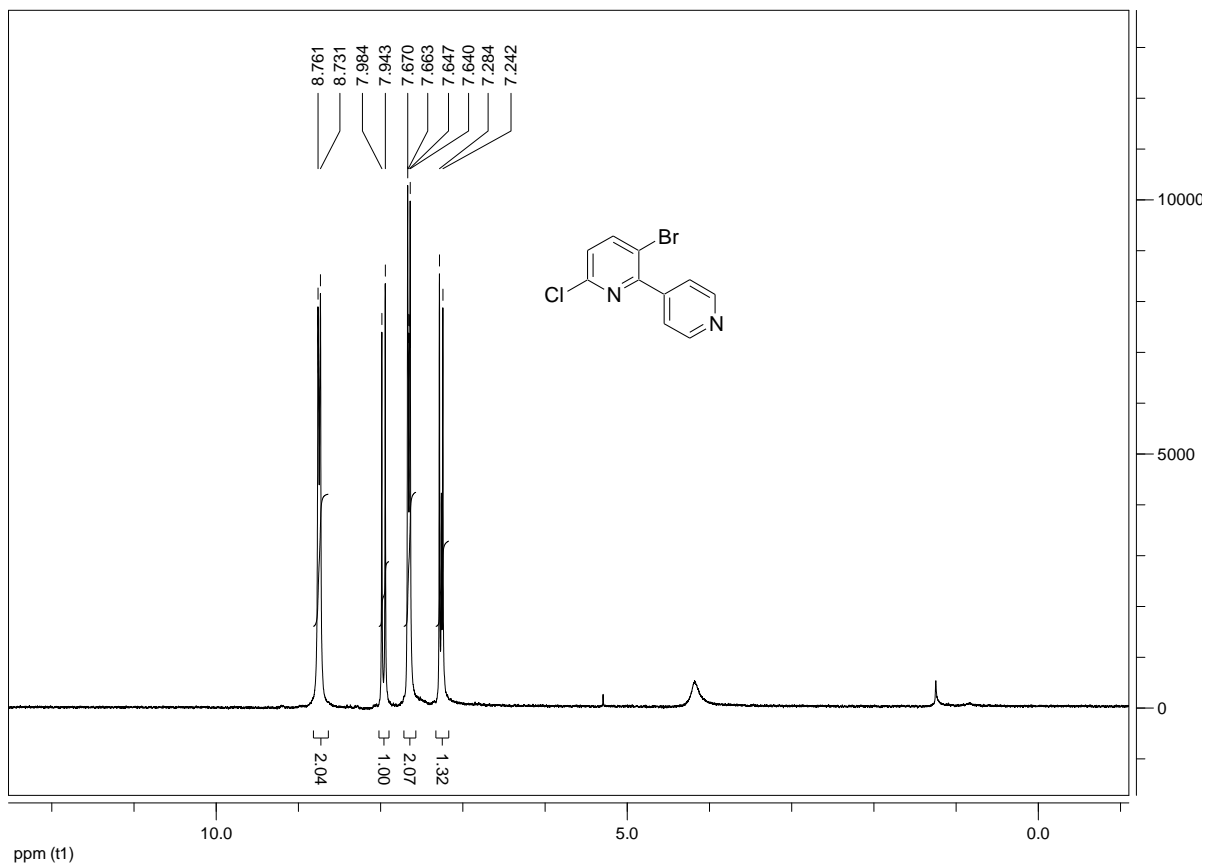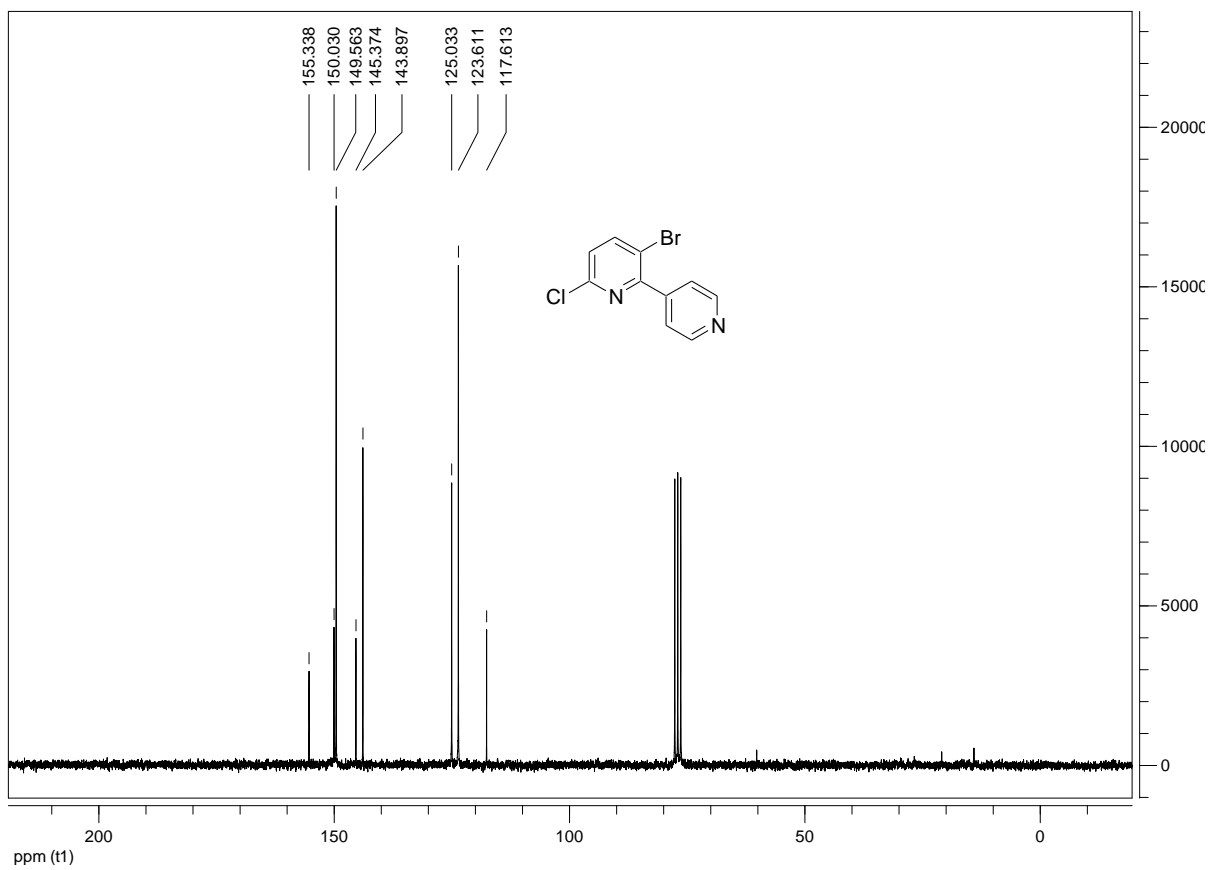

### 3-Bromo-6-chloro-2-(phenylethynyl)pyridine (14)

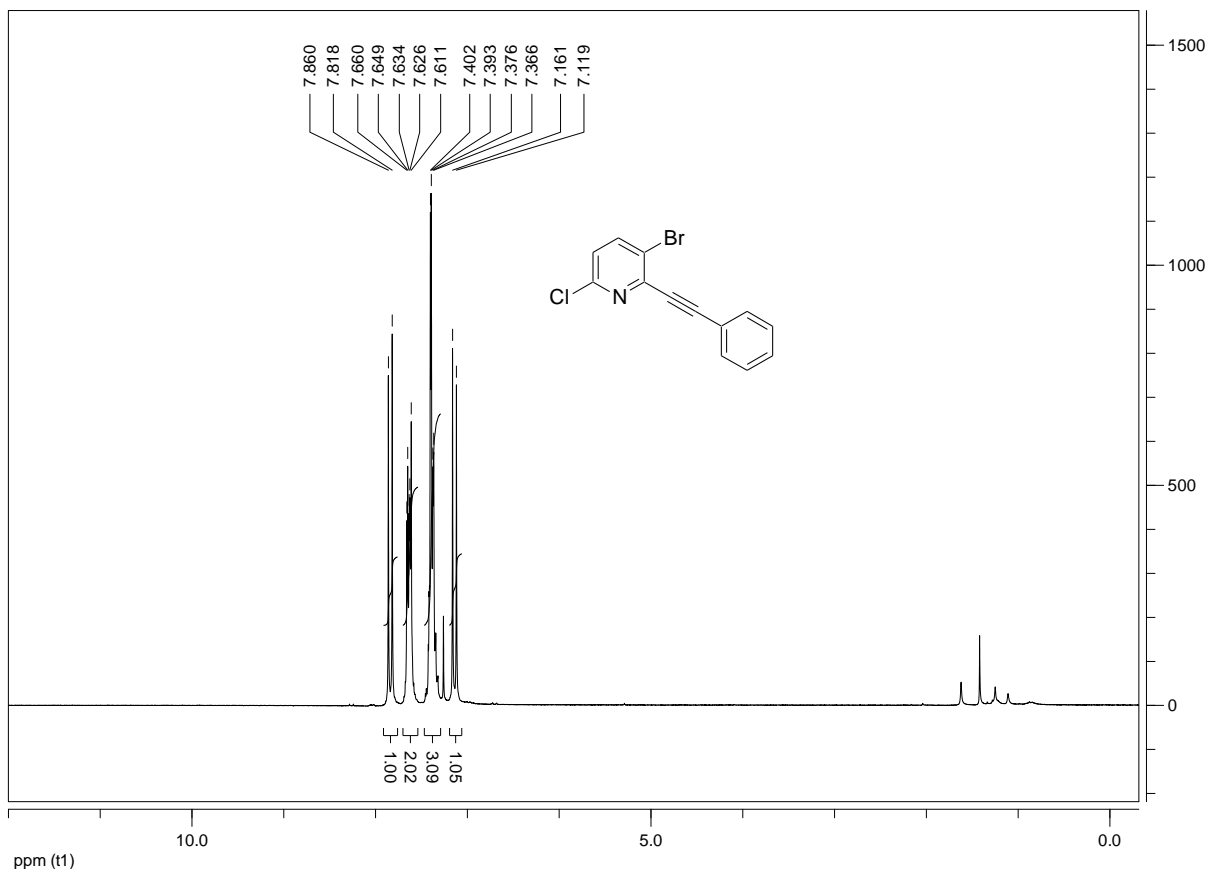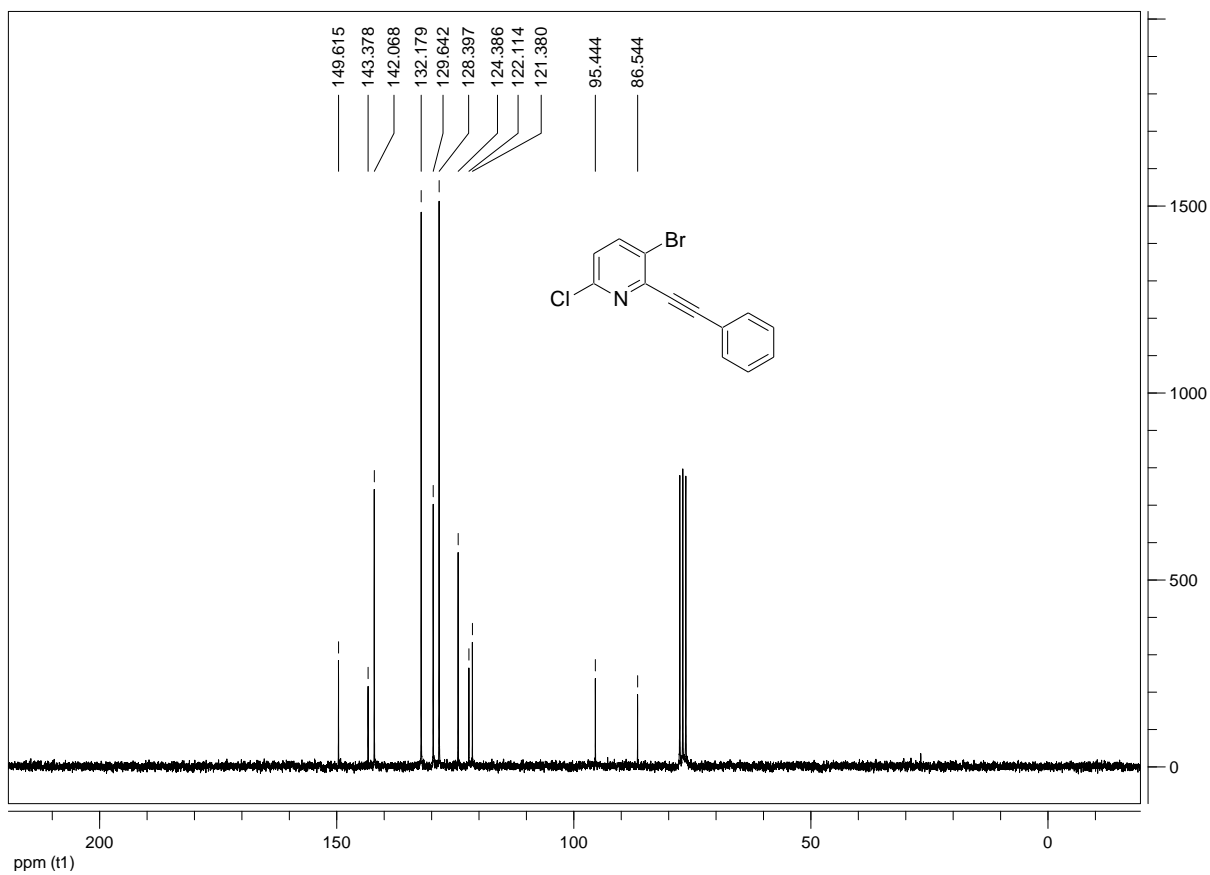

# 2-[2-(6-Phenyl-pyridin-2-yl)-benzaldehyde]-benzaldehyde (16)

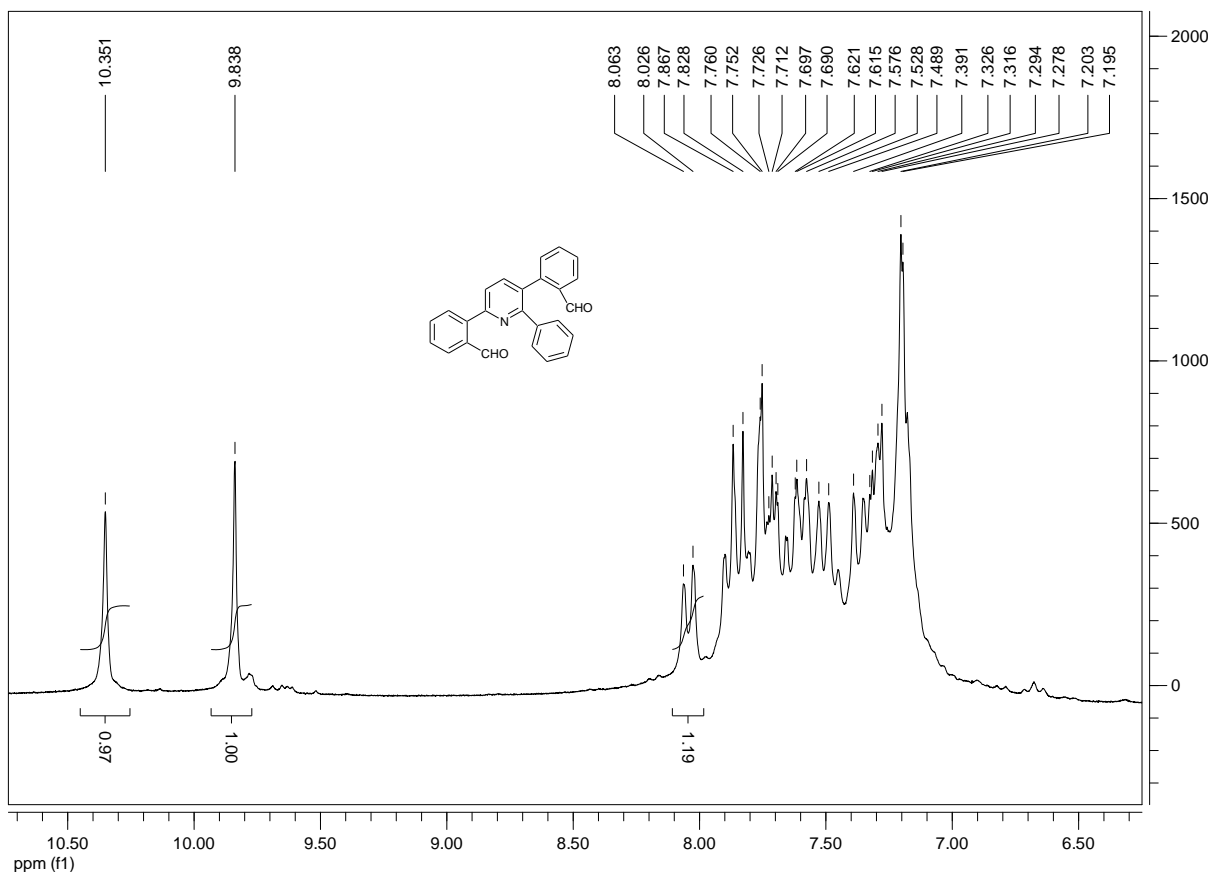

7,8-dihydro-8-hydroxy-7-phenyl-indeno[1',2':4,5]pyrido[2,1-a]isoindol-5-one (15a)

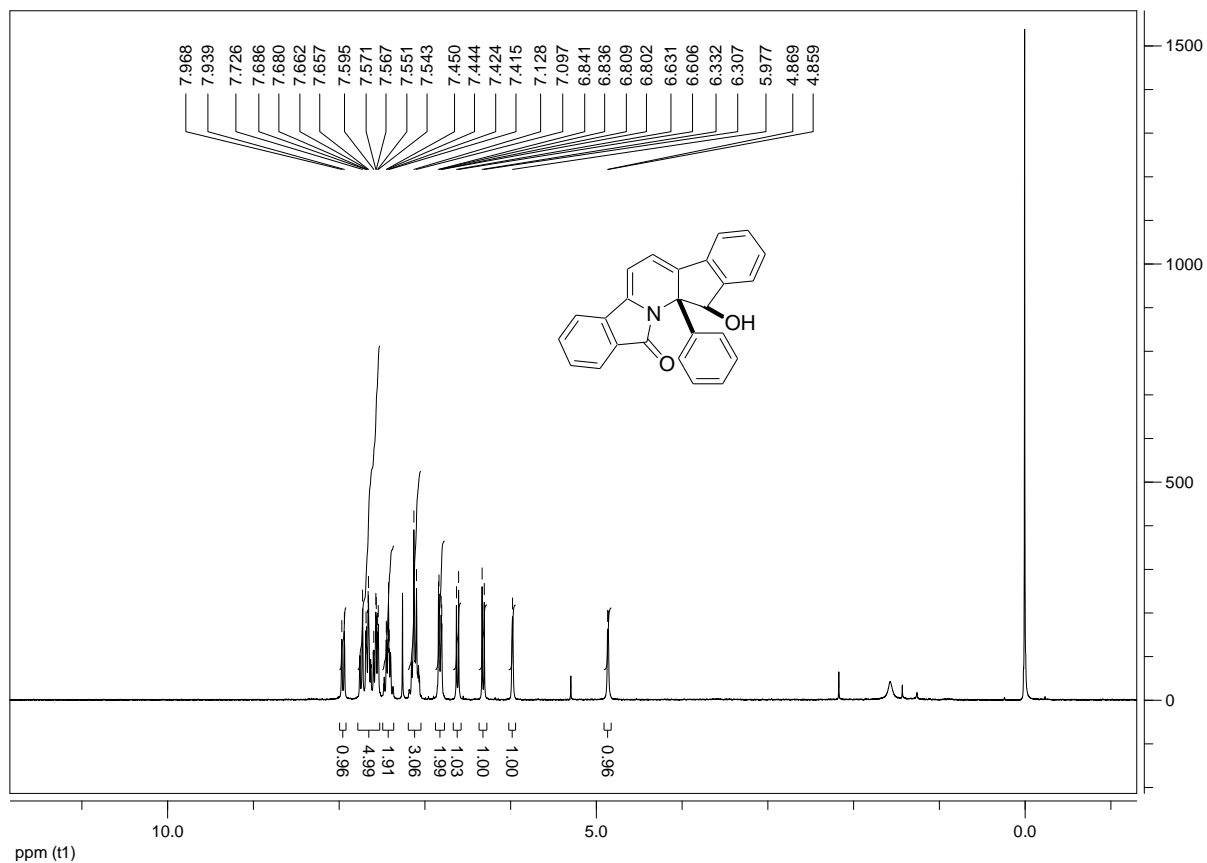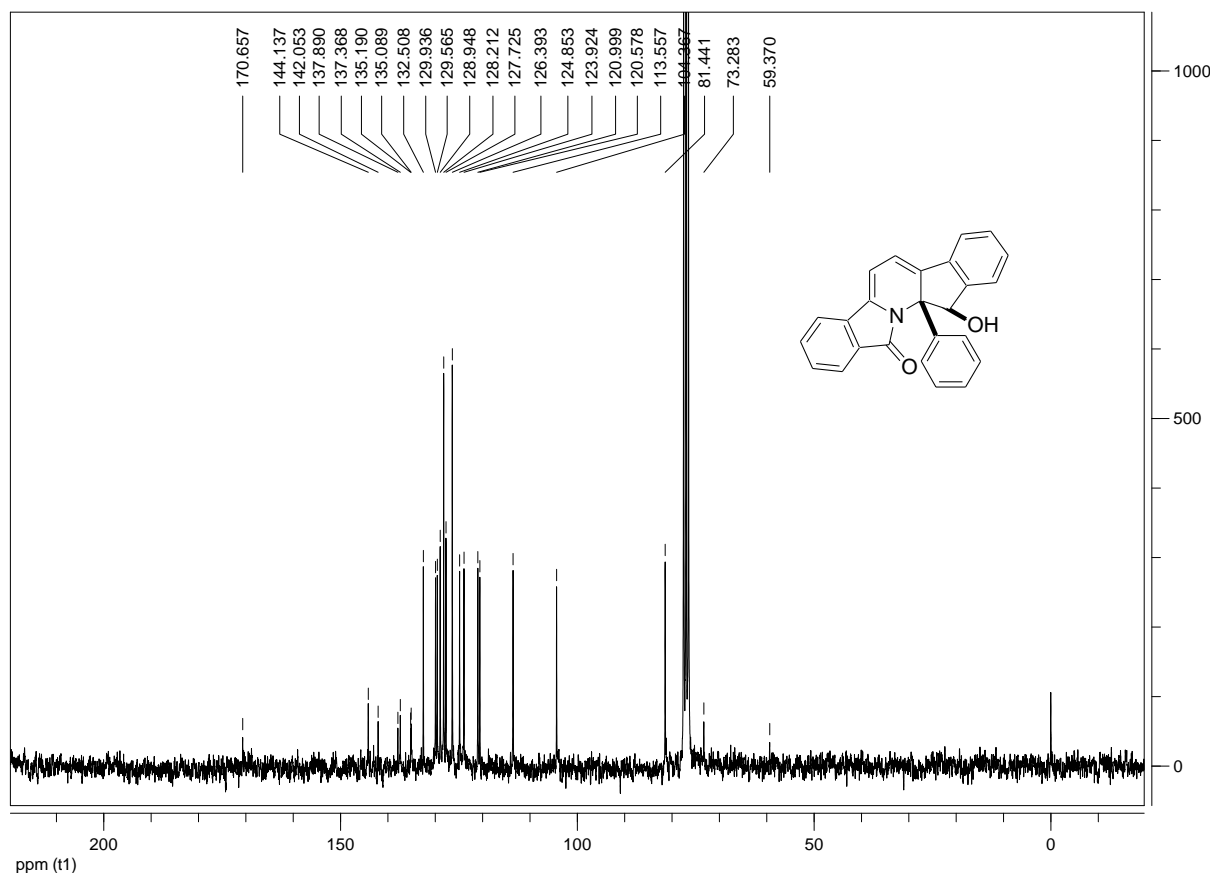

**7,8-dihydro-8-hydroxy-7-(4-methoxy-phenyl)-indeno[1',2':4,5]pyrido[2,1-a]isoindol-5-one (15b)**

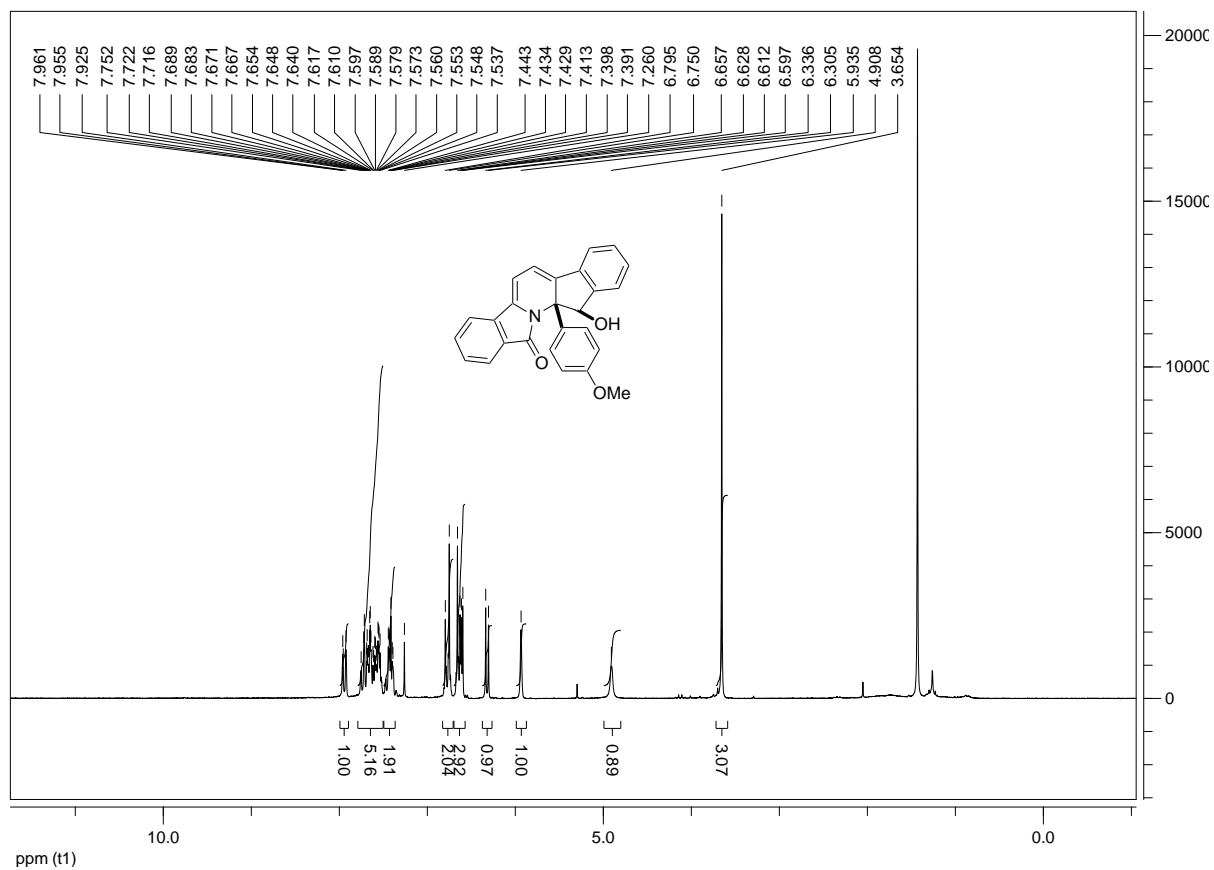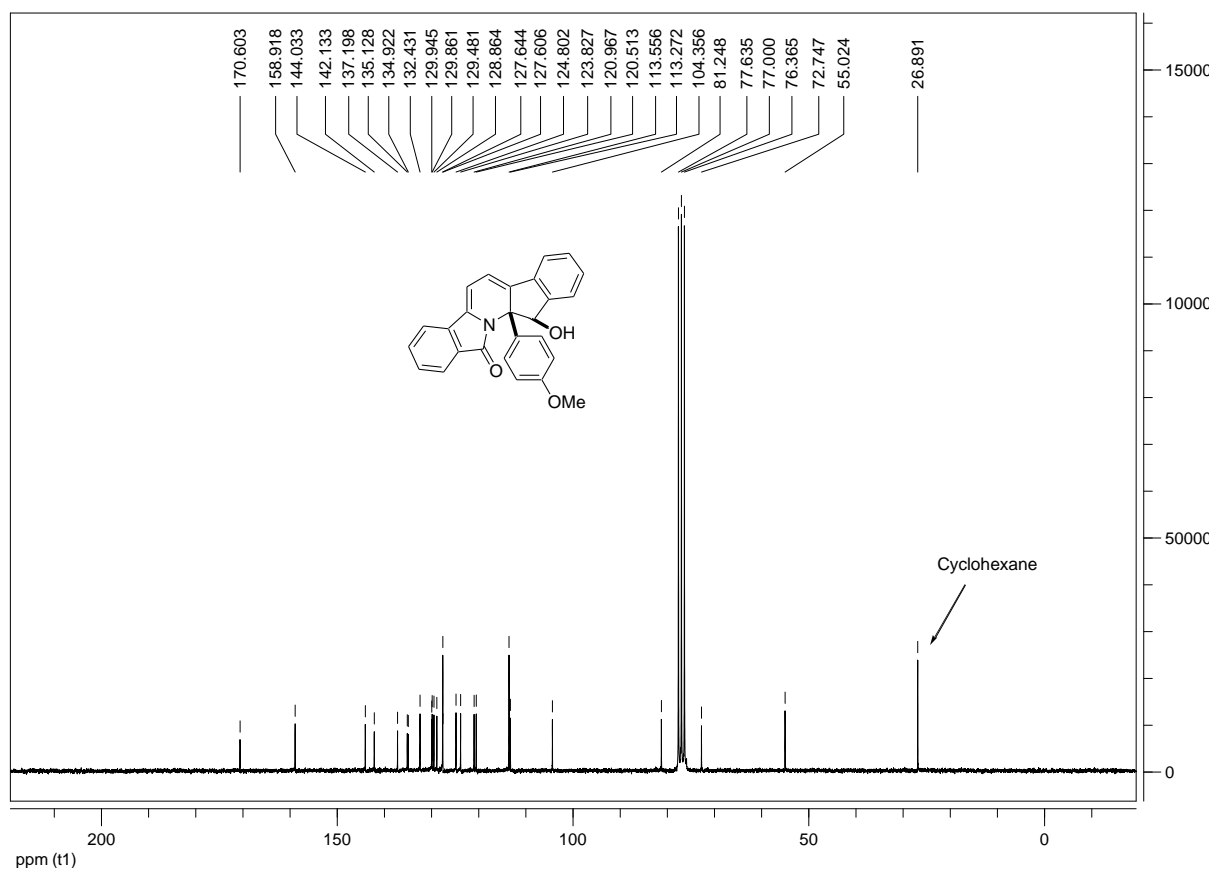



**7,8-dihydro-8-hydroxy-7-(4-methylthio-phenyl)-indeno[1',2':4,5]pyrido[2,1-a]isoindol-5-one (15c)**

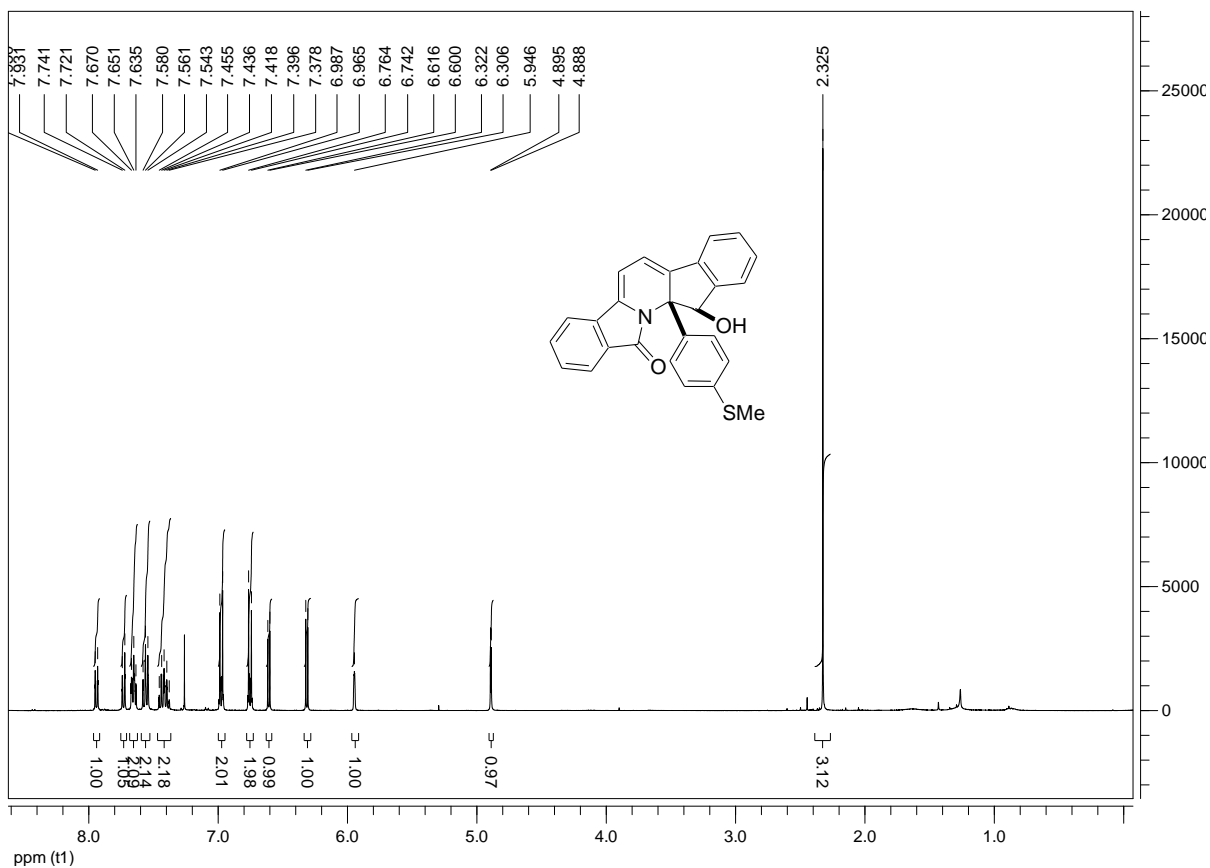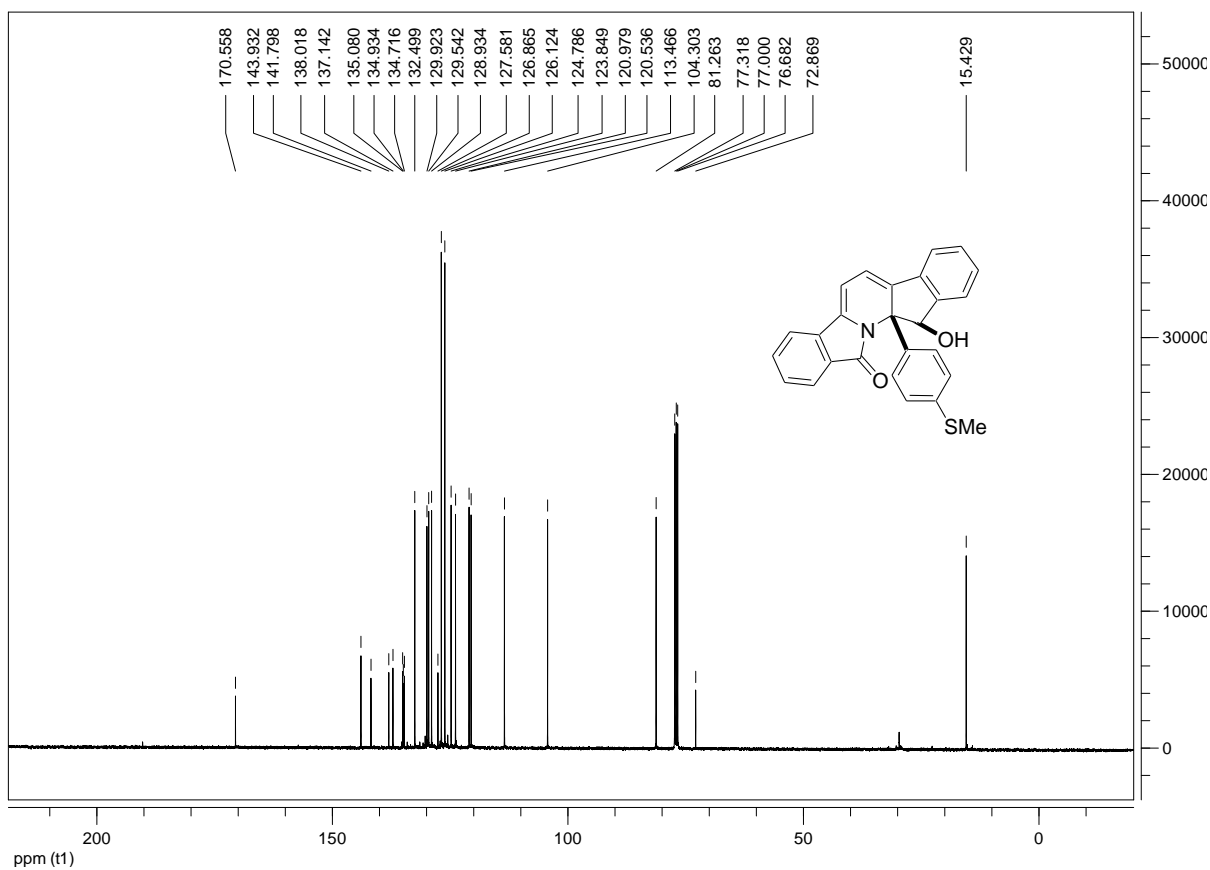

**7,8-dihydro-8-hydroxy-7-(4-formyl-phenyl)-7H-indeno[1',2':4,5]pyrido[2,1-a]isoindol-5-one (15d)**

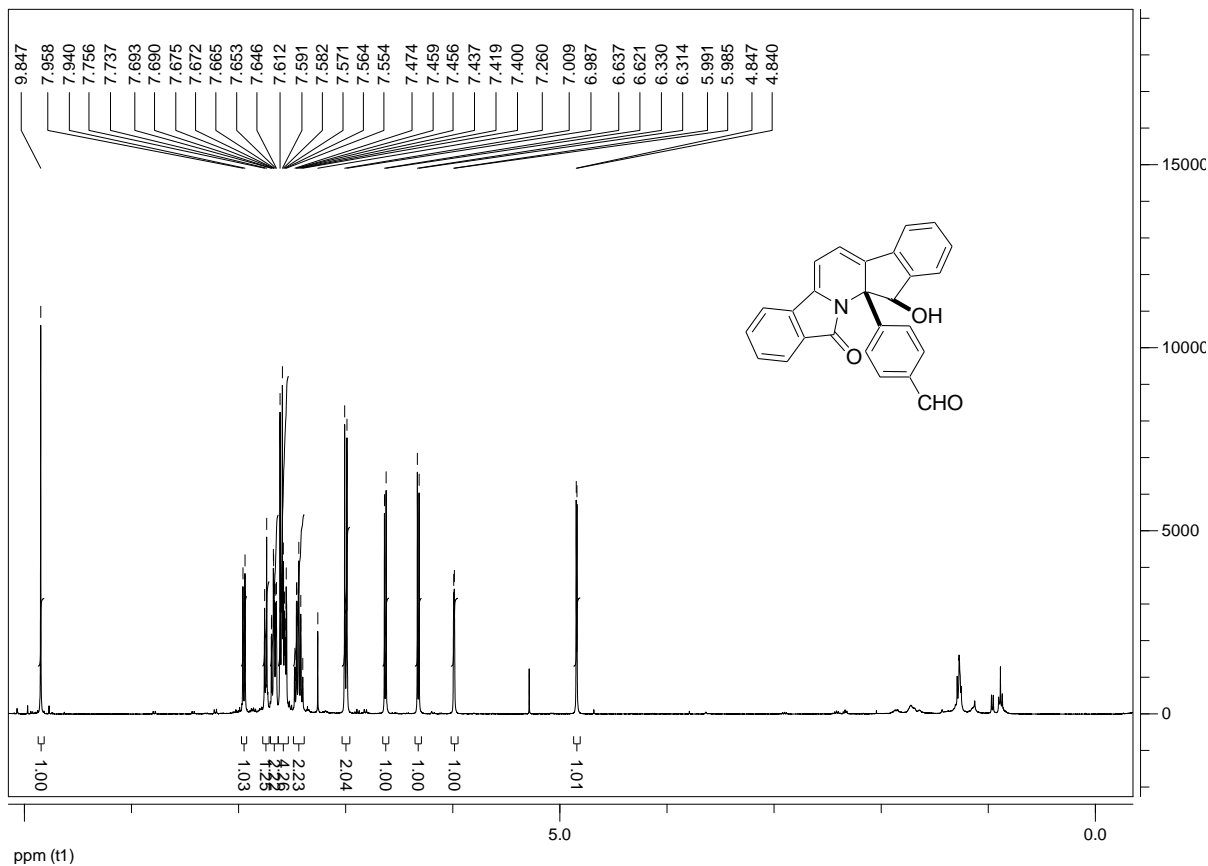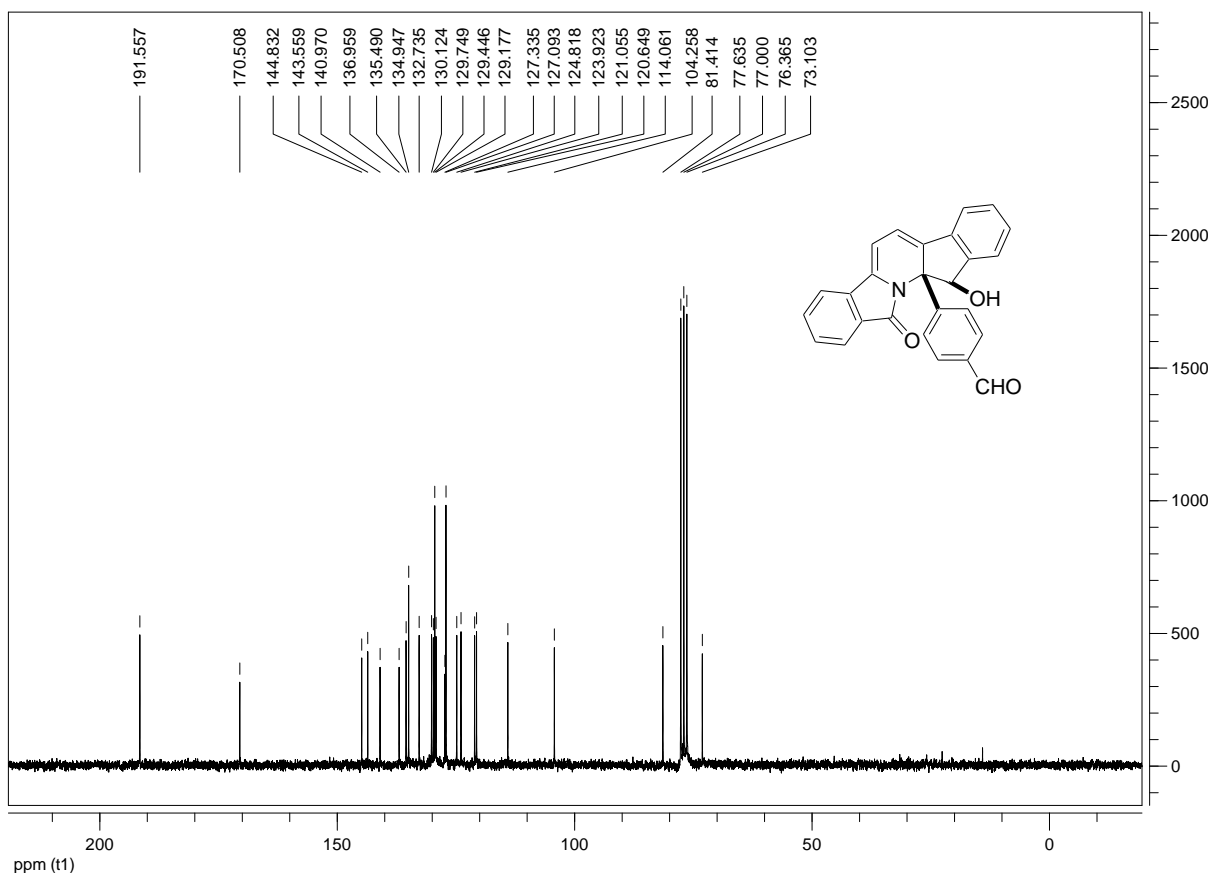

**7,8-dihydro-8-hydroxy-7-(4-pyridyl)-7H-indeno[1',2':4,5]pyrido[2,1-a]isoindol-5-one (15f)**

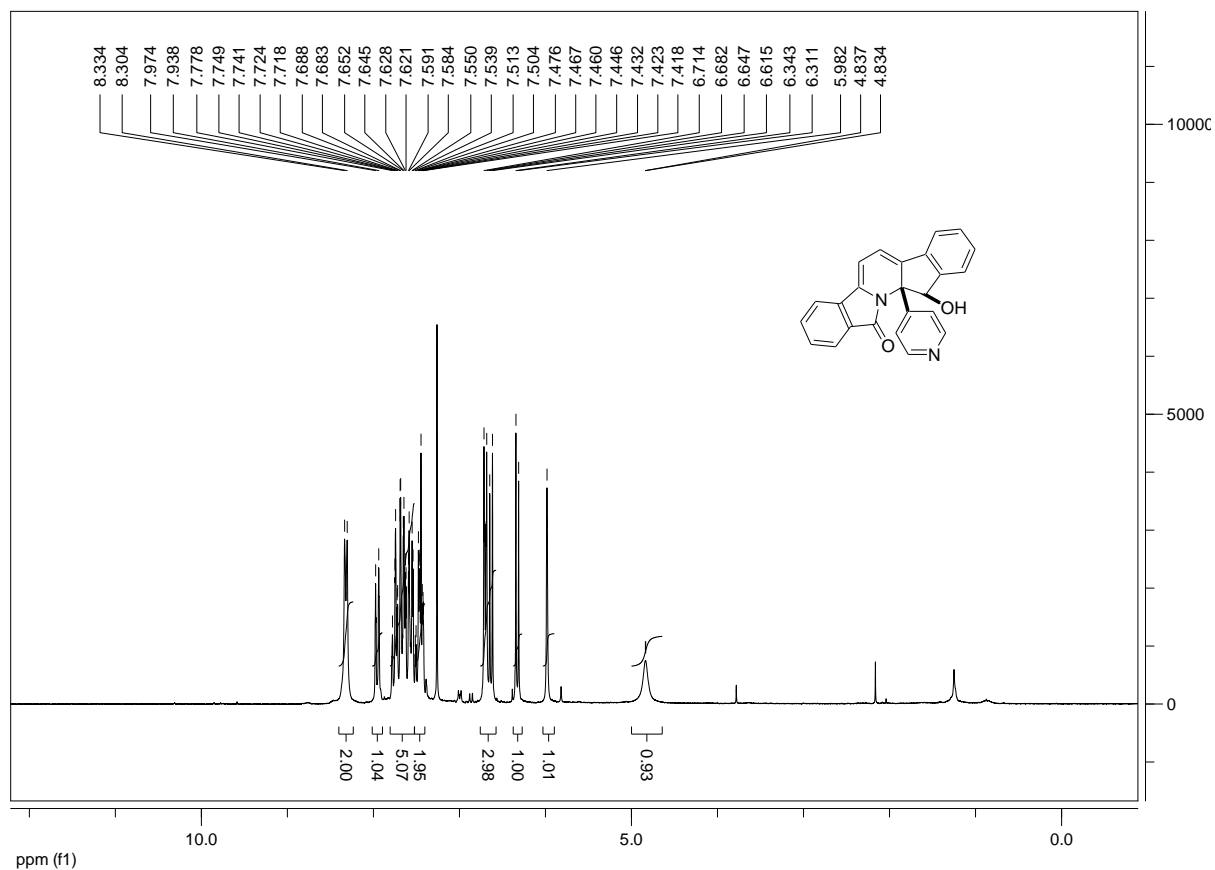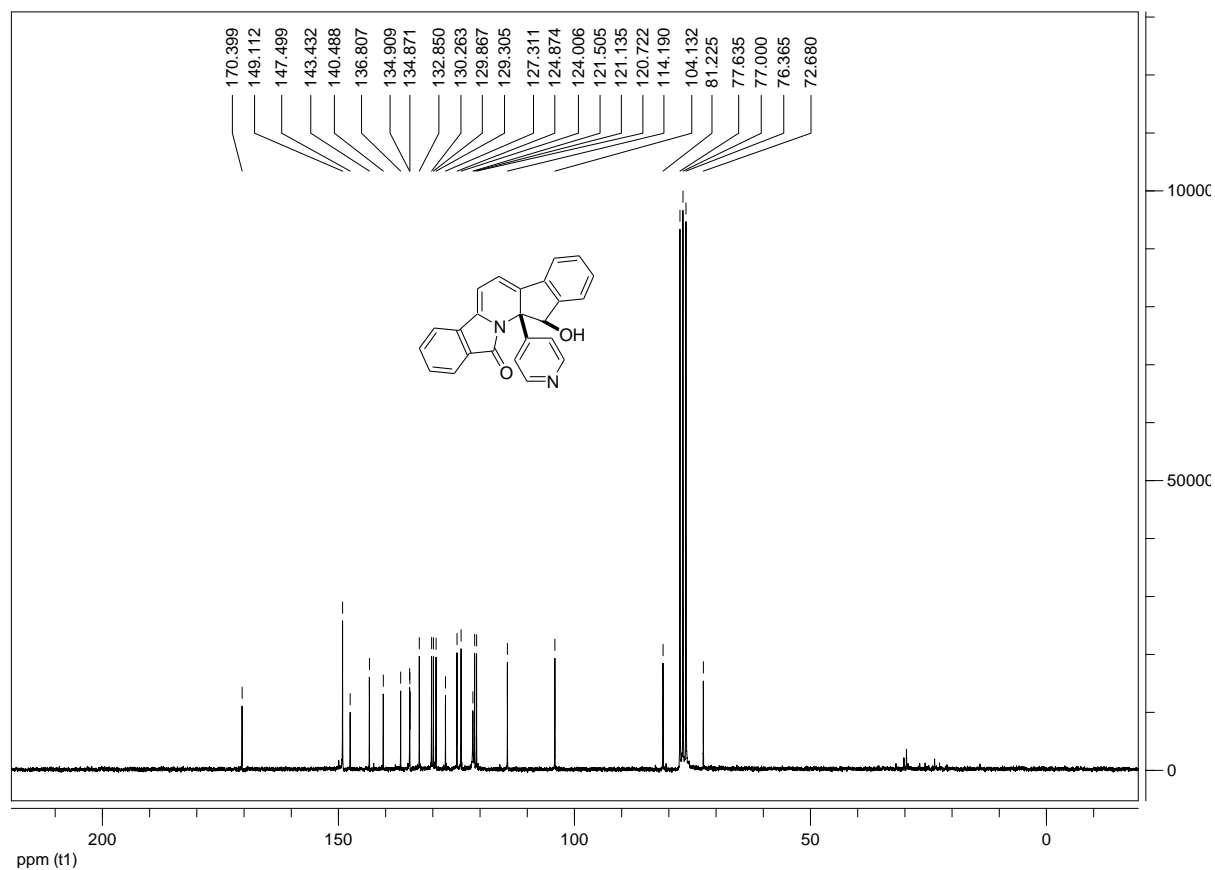

## Single Crystal Diffraction

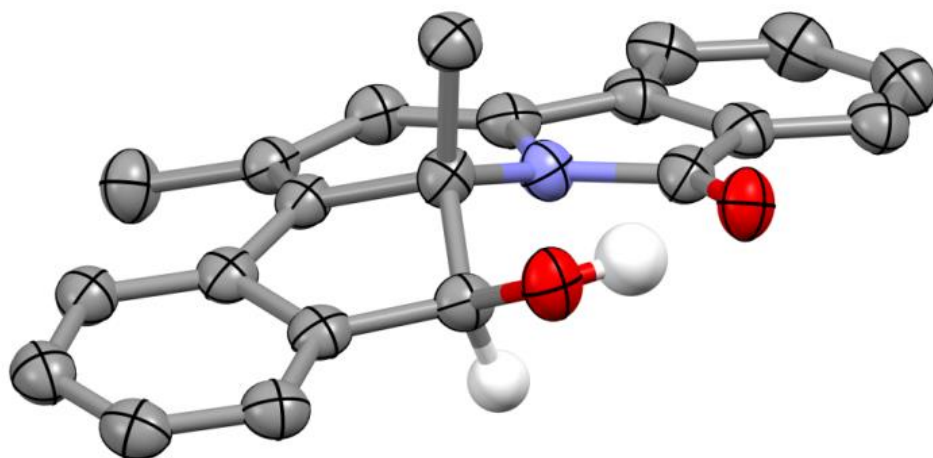

Figure S1: ORTEP plot of **2** (hydrogen atoms, except those involved in internal hydrogen bond or belonging to the  $sp^3$  backbone carbon atom are omitted for clarity); displacement ellipsoids set at 50% probability.

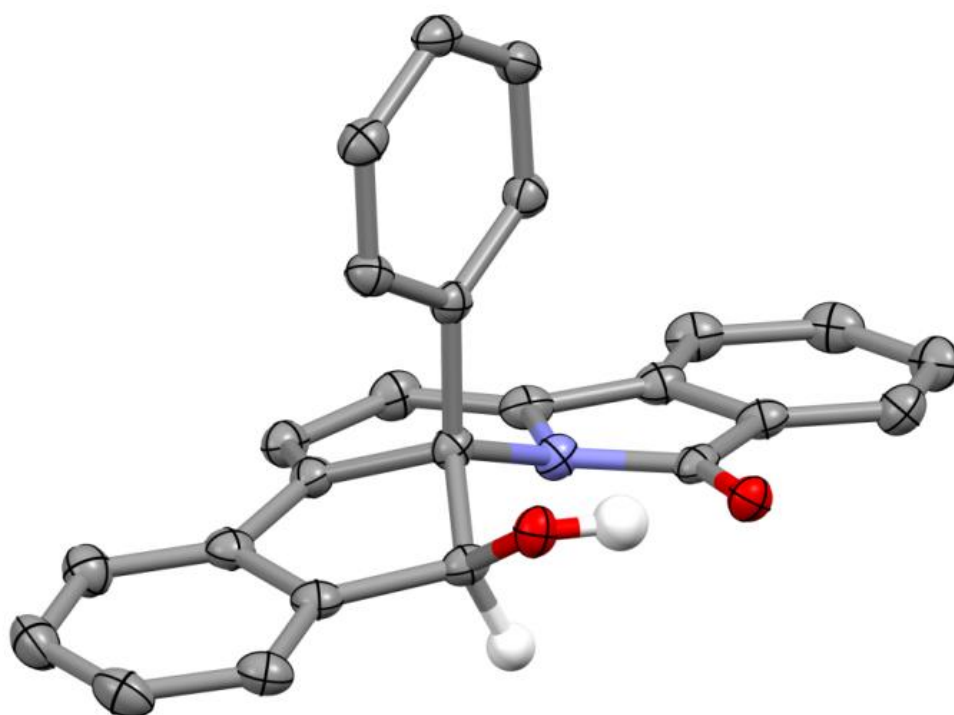

Figure S2: ORTEP plot of **15a** (hydrogen atoms, except those involved in internal hydrogen bond or belonging to the  $sp^3$  carbon atom are omitted for clarity); displacement ellipsoids set at 50% probability.

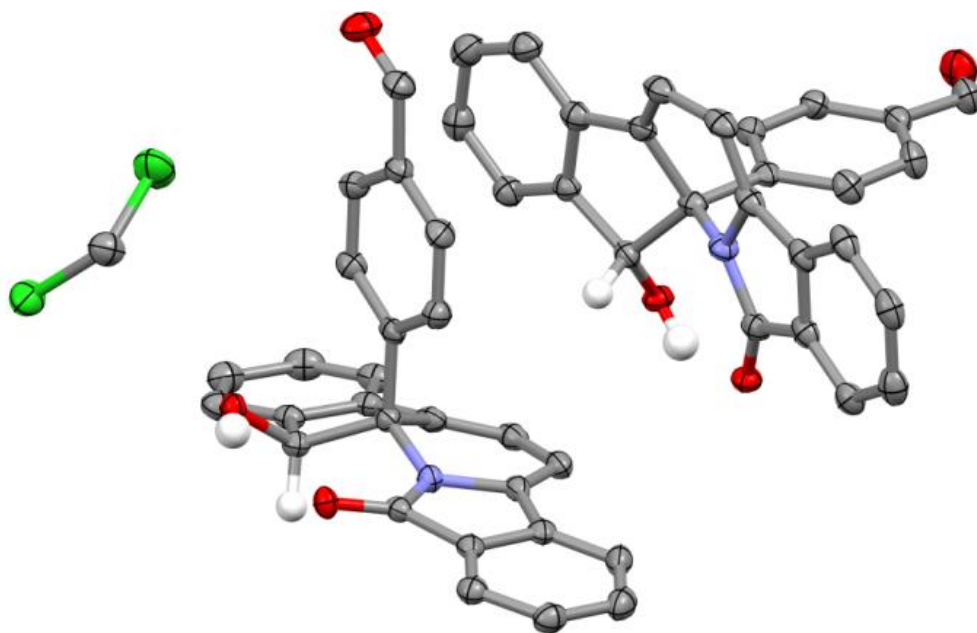

Figure S3: ORTEP plot of **15d** (hydrogen atoms, except those involved in internal hydrogen bond or belonging to the  $sp^3$  carbon atom are omitted for clarity); displacement ellipsoids set at 50% probability.
